# Supplementary material for: Inequality and heterogeneity in health-related quality of life: findings based on a large sample of cross-sectional EQ-5D-5L data from the Swedish general population
Source: Springer Nature journal article supplement (doi:10.1007/s11136-021-02982-3), 2021-10-10
Supplement: MOESM1 [file 19744802]

## **Electronic Supplementary Material (ESM)**

**ESM1.**

**Article title: Inequality and heterogeneity in health-related quality of life: findings based on a large sample of cross-sectional EQ-5D-5L data from the Swedish general population**

**Journal name: Quality of Life Research, 2021**

**doi: 10.1007/s11136-021-02982-3**

**Authors: Fitsum Sebsibe Teni, Ulf-G Gerdtham, Reiner Leidl, Martin Henriksson, Mimmi Åström, Sun Sun, Kristina Burström**

### **Corresponding author:**

Kristina Burström, PhD, Associate Professor

Health Outcomes and Economic Evaluation Research Group

Stockholm Centre for Healthcare Ethics

Department of Learning, Informatics, Management and Ethics

Karolinska Institutet

Tomtebodavägen 18a, SE-171 77 Stockholm, Sweden

email: kristina.burstrom@ki.se

ORCID: 0000-0001-9996-4317

## CONTENT

|                                                                                                                                                                                                                                                                   |    |
|-------------------------------------------------------------------------------------------------------------------------------------------------------------------------------------------------------------------------------------------------------------------|----|
| Response rate, internal response rates, and information on non-respondents .....                                                                                                                                                                                  | 3  |
| Categorisation of demographic and socioeconomic information, and variables for health-related behaviours, diseases diagnosed by a physician and self-reported conditions.....                                                                                     | 3  |
| Table S1 Sociodemographic characteristics of the populations in Sweden and the CDUST Regions, census data 2017 .....                                                                                                                                              | 5  |
| Table S2 Characteristics of respondents in Life & Health 2017 (n=25,867).....                                                                                                                                                                                     | 6  |
| Table S3 Proportion of health states reported by ten or more respondents (n=174) and the health state ‘55555’ .....                                                                                                                                               | 8  |
| Table S4 Problems in EQ-5D-5L dimensions (%), mean and median EQ VAS score, mean TTO index value, and mean VAS index value, total sample, by age group (n=25,867)                                                                                                 | 11 |
| Table S5 Problems in EQ-5D-5L dimensions (%), mean and median EQ VAS score, mean TTO index value, and mean VAS index value, by sex, 30–64 years, by economic activity (n=11,303) .....                                                                            | 12 |
| Table S6 Problems in EQ-5D-5L dimensions (%), mean and median EQ VAS score, mean TTO index value, and mean VAS index value, total sample, by diseases diagnosed by a physician and by self-reported conditions, 30–104 years .....                                | 13 |
| Table S7 Problems in EQ-5D-5L dimensions (%), mean and median EQ VAS score, mean TTO index value, and mean VAS index value, by sex, by Body Mass Index (BMI) groups, 30–104 years (n=24,694) .....                                                                | 14 |
| Table S8 Problems in EQ-5D-5L dimensions (%), mean and median EQ VAS score, mean TTO index value, and mean VAS index value, total sample, by self-reported stress and self-reported sickness (30–69 years), and number of diagnosed diseases (30–104 years)       | 15 |
| Table S9 Proportion of self-rated health (SRH) levels by sex, by age group (n=25,867) .....                                                                                                                                                                       | 16 |
| Table S10 Problems in EQ-5D-5L dimensions (%), mean and median EQ VAS score, mean TTO index value, and mean VAS index value, total sample, by self-rated health (SRH) level, 30–104 years (n=25,677).....                                                         | 17 |
| Table S11 Odds Ratios (OR) (multivariable logistic regression) for reporting any problems on the EQ-5D-5L dimensions and respondent’s sex, age, educational level and income, 30–104 years (n=25,867) .....                                                       | 18 |
| Table S12 Odds Ratios (OR) (multivariable logistic regression) for reporting any problems on the EQ-5D-5L dimensions and respondent’s sex, age, educational level, income and economic activity, 30–64 years (n=11,409).....                                      | 19 |
| Table S13 Ordinary Least Square (OLS) regression on mean EQ VAS score adjusted for sex, age, educational level, income and economic activity, 30–64 years (n=10,800) .....                                                                                        | 20 |
| Table S14 Ordinary Least Square (OLS) regression on mean EQ VAS score by health-related behaviours and diseases diagnosed by a physician, adjusted for sex, age, educational level and income, 30–104 years (n=23,899).....                                       | 21 |
| Table S15 Ordinary Least Square (OLS) regression on mean EQ VAS score by Body Mass Index (BMI) groups, adjusted for sex, age, educational level and income, 30–104 years (n=23,899)                                                                               | 22 |
| Figure S1 Ordinary Least Square (OLS) regression on mean EQ VAS score by self-reported conditions, adjusted for sex, age, educational level and income, estimates showing reduction in mean EQ VAS score with confidence intervals, 30–104 years (n=23,899) ..... | 23 |

## SUPPLEMENTARY MATERIAL

### Response rate, internal response rates, and information on non-respondents

The survey was sent out to 56,866 individuals aged 30–104 years in the regions/county councils Uppsala, Sörmland, Västmanland, Värmland, and Örebro in mid-Sweden (CDUST Region) [Burström et al., 2020, CDUST Region, 2018]. Potential participants were informed about the study and left with a choice either to participate or to refrain from participation. A returned survey was taken to rest on an informed consent to participate in the survey. The survey was answered by 26,789 individuals, yielding a 47.1% response rate. The response rate varied by age group: 55% (85 years and above); 70% (70–84 years); 53% (50–69 years); 34% (30–49 years) [CDUST Region, 2018].

Women had higher response rate than men, except among those 70 years and above where men had a slight higher response rate. Those born in Sweden had higher response rate than those born outside Sweden and those with higher education had higher response rate than those with lower educational level.

Missing responses on EQ-5D-5L dimensions were 1.4% for mobility, self-care and usual activities, respectively, 1.6% for pain/discomfort, 2.0% for anxiety/depression, and 8.7% for EQ VAS. After exclusion of individuals with missing responses in at least one dimension 3.4% (n=922) the present study used data from 25,867 individuals. Generally, internal non-respondents were older, had worse health status, lower educational level and lower income, and the proportion of women was higher compared to the respondents, however the effect size shows mainly weak level of strength of association between the specified variables and the response status [Burström et al., 2020].

### Categorisation of demographic and socioeconomic information, and variables for health-related behaviours, diseases diagnosed by a physician and self-reported conditions

Demographic information was based on sex (men as reference group) and age categorised into 5-year age groups from 30–34 years as reference group until 95–104 years. Socioeconomic characteristics were based on: educational level categorised into low (elementary school 9–10 years) as reference group, medium (secondary school 3–4 years), and high (more than 3–4 years secondary school); individualised annual income divided into five groups of equal size with first quintile (lowest) group as reference group; economic activity only for the ages up to 64 years categorised into employed as reference group, studying/parental leave, unemployed, retired, and sick leave [for details see Burström et al., 2020].

Health-related behaviours included daily smoking (reference group: no or occasional smoking), risk consumption of alcohol (reference group: no risk consumption) [Babor et al., 2001], physical activity less than 150 minutes per week (reference group: 150 minutes or more per week), and number of hours sitting per day dichotomized into sitting 10 hours or more, and sitting less than 10 hours per day (reference group).

Self-reported information on Body Mass Index (BMI) was categorised into underweight (<18.5), normal (reference group: 18.5–24.9), overweight (25.0–29.9), and obesity class I (30.0–34.9), class II (35.0–39.9) or class III (40+) [WHO, 2000]. Respondents answered whether they had specific diseases diagnosed by a physician (reference group: individuals answering not having the specific disease) and whether they had minor or severe conditions (reference group: individuals answering that they did not have the specific condition). Global Self-Rated Health (SRH) was assessed from answers to the question: ‘In your opinion, how is your health status? Is it very good, good, neither good nor bad, bad or very bad?’ Those answering neither good nor bad, bad or very bad were categorised as having ‘less than good SRH’.

Babor, T., Higgins-Biddle, J. C., Aaunders, J. B., & Monteiro, M. G. (2001). Audit. The alcohol disorders identification test. Guidelines for use in primary care. (2nd ed.). World Health Organization.

Burström, K., Teni, F. S., Gerdtham, U. G., Leidl, R., Helgesson, G., Rolfson, O., & Henriksson, M. (2020). Experience-based Swedish TTO and VAS value sets for EQ-5D-5L health states. *Pharmacoeconomics*, 38(8), 839–856.

CDUST Region 2018. Liv & hälsa 2017 i Mellansverige: resultat från en undersökning om livsvillkor, levnadsvanor och hälsa (in Swedish). [Life and health 2017: results from a survey on living conditions, health-related behaviours and health]. Available from: <https://www.regionvarmland.se/globalassets/global/om-regionen/pressrum/pressmeddelanden/2018/februari/rv-liv-och-halsa-2017.pdf> (accessed 8 June 2021).

WHO consultation on obesity. Obesity: Preventing and managing the global epidemic, Report of a WHO Consultation. Geneva, Switzerland, WHO 2000. [http://whqlibdoc.who.int/trs/WHO\\_TRS\\_894.pdf](http://whqlibdoc.who.int/trs/WHO_TRS_894.pdf). (accessed 15 Jan 2021).

**Table S1** Sociodemographic characteristics of the populations in Sweden and the CDUST Regions, census data 2017

| Variable                                       | Sweden  |       | Uppsala |       | Södermanland |       | Västmanland |       | Värmland |       | Örebro  |       |
|------------------------------------------------|---------|-------|---------|-------|--------------|-------|-------------|-------|----------|-------|---------|-------|
|                                                | Men     | Women | Men     | Women | Men          | Women | Men         | Women | Men      | Women | Men     | Women |
| Proportion of men and women (%)                | 50.2    | 49.8  | 50.0    | 50.0  | 50.1         | 49.9  | 50.3        | 49.7  | 50.3     | 49.7  | 50.1    | 49.9  |
| Average age (years)                            | 41.2    |       | 40.1    |       | 42.3         |       | 49.7        |       | 43.5     |       | 41.6    |       |
| Educational level <sup>a</sup>                 |         |       |         |       |              |       |             |       |          |       |         |       |
| Low                                            | 21.2    | 19.0  | 19.3    | 16.5  | 24.6         | 23.2  | 22.8        | 21.6  | 22.3     | 21.5  | 23.2    | 21.0  |
| Medium                                         | 44.8    | 40.2  | 41.9    | 37.1  | 49.8         | 43.6  | 48.8        | 43.0  | 50.8     | 47.1  | 49.2    | 42.7  |
| High                                           | 31.1    | 38.6  | 36.1    | 44.4  | 23.4         | 31.2  | 26.0        | 33.2  | 24.2     | 35.1  | 25.6    | 34.4  |
| No information                                 | 2.9     | 2.1   | 2.7     | 1.9   | 2.3          | 1.9   | 2.3         | 1.9   | 2.7      | 2.1   | 2.1     | 1.8   |
| Income (median equivalised) (SEK) <sup>b</sup> | 256,600 |       | 260,700 |       | 244,100      |       | 250,200     |       | 235,500  |       | 240,800 |       |

<sup>a</sup> low= elementary school 9–10 years; medium= secondary school 3–4 years; high= more than 3–4 years secondary school

<sup>b</sup> 1 SEK = 9.63 Euro (2017 prices) (Swedish Riksbank)

Swedish Riksbank. Annual average exchange rates, December, 2017. Accessed 1 August, 2021. <https://www.riksbank.se/en-gb/statistics/search-interest--exchange-rates/annual-average-exchange-rates/?y=2017&m=12&s=Dot&f=y>

The table is published in Online Resource ESM\_1 to the article Burström, K., Teni, F. S., Gerdtham, U, G., Leidl, R., Helgesson, G., Rolfson, O., & Henriksson, M. (2020). Experience-based Swedish TTO and VAS value sets for EQ-5D-5L health states. *Pharmacoeconomics*, 38(8), 839–856

**Table S2** Characteristics of respondents in Life & Health 2017 (n=25,867)

| Variable                                         | %    | n           |
|--------------------------------------------------|------|-------------|
| <b>Sex</b>                                       |      |             |
| Men                                              | 47.4 | 12,249      |
| Women                                            | 52.6 | 13,618      |
| <b>Mean age (years) [SD]</b>                     |      | 64.3 [16.0] |
| <b>Age group (years)</b>                         |      |             |
| 30-34                                            | 4.4  | 1,127       |
| 35-39                                            | 4.6  | 1,202       |
| 40-44                                            | 5.7  | 1,473       |
| 45-49                                            | 6.7  | 1,722       |
| 50-54                                            | 7.0  | 1,824       |
| 55-59                                            | 7.4  | 1,917       |
| 60-64                                            | 8.3  | 2,144       |
| 65-69                                            | 10.2 | 2,647       |
| 70-74                                            | 17.4 | 4,489       |
| 75-79                                            | 11.5 | 2,972       |
| 80-84                                            | 6.7  | 1,723       |
| 85-89                                            | 6.8  | 1,762       |
| 90-94                                            | 2.7  | 703         |
| 95-104                                           | 0.6  | 162         |
| <b>Educational level <sup>a</sup></b>            |      |             |
| Low                                              | 23.2 | 6,005       |
| Medium                                           | 42.6 | 11,027      |
| High                                             | 33.6 | 8,694       |
| Missing                                          | 0.6  | 141         |
| <b>Income</b>                                    |      |             |
| First quintile (lowest)                          | 19.9 | 5,159       |
| Second quintile                                  | 20.0 | 5,160       |
| Third quintile                                   | 19.9 | 5,159       |
| Fourth quintile                                  | 20.0 | 5,160       |
| Fifth quintile (highest)                         | 19.9 | 5,159       |
| Missing                                          | 0.3  | 70          |
| <b>Economic activity (30–64 years)</b>           |      |             |
| Employed                                         | 83.7 | 9,549       |
| Studying/parental leave                          | 3.5  | 403         |
| Unemployed                                       | 3.5  | 394         |
| Retired                                          | 1.1  | 122         |
| Sick leave                                       | 7.3  | 835         |
| Missing                                          | 0.9  | 106         |
| <b>Self-rated health (SRH)</b>                   |      |             |
| Very good                                        | 15.7 | 4,064       |
| Good                                             | 48.9 | 12,650      |
| Neither good or bad                              | 28.5 | 7,378       |
| Bad                                              | 5.1  | 1,323       |
| Very bad                                         | 1.0  | 262         |
| Missing                                          | 0.7  | 190         |
| <b>Less than good SRH</b>                        | 34.6 | 9,153       |
| <b>Smoking daily</b>                             | 8.2  | 2,110       |
| <b>Risk consumption of alcohol</b>               | 8.8  | 2,286       |
| <b>Active less than 150 minutes per week</b>     | 39.9 | 10,118      |
| <b>Sitting (hours per day)</b>                   |      |             |
| More than 12                                     | 3.2  | 829         |
| 10 to 12                                         | 8.3  | 2,153       |
| 7 to 9                                           | 22.6 | 5,851       |
| 4 to 6                                           | 43.2 | 11,169      |
| 1 to 3                                           | 18.6 | 4,821       |
| Less than 1                                      | 0.9  | 220         |
| Sit/lie for more than 12 hours due to disability | 1.7  | 434         |
| Missing                                          | 1.5  | 390         |
| <b>BMI (self-reported height and weight)</b>     |      |             |
| Underweight                                      | 1.5  | 383         |
| Normal                                           | 37.4 | 9,685       |
| Overweight                                       | 37.8 | 9,785       |
| Obese class I                                    | 13.6 | 3,519       |
| Obese class II                                   | 3.4  | 886         |
| Obese class III                                  | 1.7  | 436         |
| Missing                                          | 4.5  | 1,173       |

|                                                                                  |      |               |
|----------------------------------------------------------------------------------|------|---------------|
| <b>Diseases diagnosed by a physician</b>                                         |      |               |
| Asthma                                                                           | 7.0  | 1,803         |
| COPD                                                                             | 3.4  | 870           |
| Depression                                                                       | 7.3  | 1,891         |
| Diabetes                                                                         | 10.0 | 2,575         |
| Hypertension                                                                     | 32.2 | 8,321         |
| <b>Number of diseases</b>                                                        |      |               |
| One                                                                              | 31.6 | 8,182         |
| Two                                                                              | 9.1  | 2,349         |
| Three                                                                            | 1.5  | 383           |
| Four                                                                             | 0.2  | 63            |
| Five                                                                             | 0.1  | 16            |
| Missing                                                                          | 5.3  | 1,367         |
| <b>Self-reported conditions</b>                                                  |      |               |
| <b>Headache or migraine</b>                                                      |      |               |
| Minor                                                                            | 15.8 | 4,077         |
| Severe                                                                           | 2.2  | 572           |
| <b>Ache/pain in shoulders/neck</b>                                               |      |               |
| Minor                                                                            | 41.2 | 10,644        |
| Severe                                                                           | 6.5  | 1,668         |
| <b>Ache/pain in elbows/legs/knees</b>                                            |      |               |
| Minor                                                                            | 41.3 | 10,693        |
| Severe                                                                           | 7.7  | 1,999         |
| <b>Ache/pain in back/hip or sciatica</b>                                         |      |               |
| Minor                                                                            | 41.1 | 10,631        |
| Severe                                                                           | 8.9  | 2,306         |
| <b>Recurrent stomach/bowel problems</b>                                          |      |               |
| Minor                                                                            | 21.4 | 5,523         |
| Severe                                                                           | 3.7  | 950           |
| <b>Eczema</b>                                                                    |      |               |
| Minor                                                                            | 11.9 | 3,069         |
| Severe                                                                           | 1.1  | 277           |
| <b>Dejection</b>                                                                 |      |               |
| Minor                                                                            | 22.1 | 5,723         |
| Severe                                                                           | 2.5  | 649           |
| <b>Anxiety/worry</b>                                                             |      |               |
| Minor                                                                            | 23.4 | 6,049         |
| Severe                                                                           | 2.9  | 742           |
| <b>Sleeping difficulties</b>                                                     |      |               |
| Minor                                                                            | 28.7 | 7,432         |
| Severe                                                                           | 5.9  | 1,512         |
| <b>Tiredness</b>                                                                 |      |               |
| Minor                                                                            | 39.9 | 10,310        |
| Severe                                                                           | 7.0  | 1,811         |
| <b>Stress (30–69 years)</b>                                                      |      |               |
| Not at all                                                                       | 43.7 | 6,142         |
| To some extent                                                                   | 43.9 | 6,170         |
| Quite a lot                                                                      | 9.1  | 1,285         |
| Very much                                                                        | 2.8  | 391           |
| Missing                                                                          | 0.5  | 68            |
| <b>Sick for more than 29 continuous days in the past 12 months (30–69 years)</b> |      |               |
| No, I have not been sick for a continuous period of 29 days or more              | 65.1 | 9,151         |
| Yes, for problems with my back, neck, joints or muscles                          | 2.3  | 317           |
| Yes, for exhaustion, fatigue, depression, stress                                 | 3.2  | 455           |
| Yes, for other mental health problems (including insomnia)                       | 0.9  | 120           |
| Yes, for cardiovascular disease, stroke                                          | 0.4  | 60            |
| Yes, for accidents, injury                                                       | 1.3  | 187           |
| Yes, for other reasons                                                           | 2.5  | 344           |
| Missing (across all variables)                                                   | 21.3 | 3,691         |
| <b>EQ VAS score (mean) [SD]</b>                                                  |      | 76.1 [18.7]   |
| <b>EQ VAS score (median) [IQR]</b>                                               |      | 80.0 [20.0]   |
| <b>TTO index value (mean) [SD]</b>                                               |      | 0.892 [0.114] |
| <b>VAS index value (mean) [SD]</b>                                               |      | 75.9 [14.0]   |

<sup>a</sup> low= elementary school 9–10 years; medium= secondary school 3–4 years; high= more than 3–4 years secondary school

The table is adapted from Table 2 in Burström, K., Teni, F. S., Gerdtham, U. G., Leidl, R., Helgesson, G., Rolfson, O., & Henriksson, M. (2020). Experience-based Swedish TTO and VAS value sets for EQ-5D-5L health states. *PharmacoEconomics*, 38(8), 839–856.

**Table S3** Proportion of health states reported by ten or more respondents (n=174) and the health state ‘55555’

| Health state | n    | %    | Cumulative % |
|--------------|------|------|--------------|
| 11111        | 6234 | 24.1 | 24.1         |
| 11121        | 4445 | 17.2 | 41.3         |
| 11122        | 1987 | 7.7  | 49.0         |
| 11112        | 1213 | 4.7  | 53.7         |
| 11131        | 778  | 3.0  | 56.7         |
| 21121        | 751  | 2.9  | 59.6         |
| 21221        | 461  | 1.8  | 61.3         |
| 11132        | 441  | 1.7  | 63.1         |
| 21231        | 409  | 1.6  | 64.6         |
| 11221        | 334  | 1.3  | 65.9         |
| 21232        | 353  | 1.4  | 67.3         |
| 21122        | 300  | 1.2  | 68.5         |
| 11222        | 296  | 1.1  | 69.6         |
| 21131        | 290  | 1.1  | 70.7         |
| 21222        | 288  | 1.1  | 71.8         |
| 31231        | 212  | 0.8  | 72.6         |
| 11123        | 194  | 0.7  | 73.4         |
| 11232        | 186  | 0.7  | 74.1         |
| 31232        | 172  | 0.7  | 74.8         |
| 21132        | 168  | 0.6  | 75.4         |
| 11231        | 153  | 0.6  | 76.0         |
| 31331        | 141  | 0.5  | 76.6         |
| 21111        | 133  | 0.5  | 77.1         |
| 31332        | 129  | 0.5  | 77.6         |
| 11113        | 118  | 0.5  | 78.0         |
| 31131        | 113  | 0.4  | 78.5         |
| 11133        | 108  | 0.4  | 78.9         |
| 31221        | 94   | 0.4  | 79.3         |
| 32332        | 84   | 0.3  | 79.6         |
| 22232        | 77   | 0.3  | 79.9         |
| 31121        | 70   | 0.3  | 80.1         |
| 32232        | 70   | 0.3  | 80.4         |
| 21233        | 69   | 0.3  | 80.7         |
| 11223        | 68   | 0.3  | 80.9         |
| 21211        | 66   | 0.3  | 81.2         |
| 22222        | 64   | 0.2  | 81.5         |
| 22221        | 62   | 0.2  | 81.7         |
| 31132        | 62   | 0.2  | 81.9         |
| 31222        | 57   | 0.2  | 82.2         |
| 22231        | 56   | 0.2  | 82.4         |
| 11233        | 55   | 0.2  | 82.6         |
| 11211        | 54   | 0.2  | 82.8         |
| 11212        | 54   | 0.2  | 83.0         |
| 32231        | 53   | 0.2  | 83.2         |
| 21331        | 50   | 0.2  | 83.4         |
| 32331        | 49   | 0.2  | 83.6         |
| 21332        | 47   | 0.2  | 83.8         |
| 33332        | 41   | 0.2  | 83.9         |
| 21223        | 39   | 0.2  | 84.1         |
| 31321        | 36   | 0.1  | 84.2         |
| 11332        | 35   | 0.1  | 84.4         |
| 31342        | 35   | 0.1  | 84.5         |
| 33331        | 35   | 0.1  | 84.6         |
| 21112        | 32   | 0.1  | 84.7         |
| 41231        | 32   | 0.1  | 84.9         |
| 31211        | 31   | 0.1  | 85.0         |
| 31233        | 31   | 0.1  | 85.1         |
| 11124        | 30   | 0.1  | 85.2         |
| 11141        | 30   | 0.1  | 85.3         |
| 21242        | 30   | 0.1  | 85.5         |
| 12221        | 29   | 0.1  | 85.6         |



|       |    |     |      |
|-------|----|-----|------|
| 55532 | 29 | 0.1 | 85.7 |
| 11331 | 28 | 0.1 | 85.8 |
| 21212 | 28 | 0.1 | 85.9 |
| 32222 | 28 | 0.1 | 86.0 |
| 43442 | 28 | 0.1 | 86.1 |
| 31122 | 26 | 0.1 | 86.2 |
| 31242 | 26 | 0.1 | 86.3 |
| 31333 | 26 | 0.1 | 86.4 |
| 43332 | 26 | 0.1 | 86.5 |
| 44443 | 26 | 0.1 | 86.6 |
| 21123 | 25 | 0.1 | 86.7 |
| 22332 | 25 | 0.1 | 86.8 |
| 31241 | 25 | 0.1 | 86.9 |
| 32342 | 25 | 0.1 | 87.0 |
| 33333 | 24 | 0.1 | 87.1 |
| 42331 | 24 | 0.1 | 87.2 |
| 11322 | 23 | 0.1 | 87.3 |
| 42442 | 23 | 0.1 | 87.4 |
| 44442 | 23 | 0.1 | 87.5 |
| 21133 | 22 | 0.1 | 87.5 |
| 21321 | 22 | 0.1 | 87.6 |
| 21322 | 22 | 0.1 | 87.7 |
| 31341 | 22 | 0.1 | 87.8 |
| 12121 | 21 | 0.1 | 87.9 |
| 12231 | 21 | 0.1 | 88.0 |
| 31322 | 21 | 0.1 | 88.0 |
| 32233 | 21 | 0.1 | 88.1 |
| 41332 | 21 | 0.1 | 88.2 |
| 11333 | 20 | 0.1 | 88.3 |
| 21241 | 20 | 0.1 | 88.4 |
| 32333 | 20 | 0.1 | 88.4 |
| 41331 | 20 | 0.1 | 88.5 |
| 43432 | 20 | 0.1 | 88.6 |
| 43443 | 20 | 0.1 | 88.7 |
| 11321 | 19 | 0.1 | 88.7 |
| 41232 | 19 | 0.1 | 88.8 |
| 43331 | 19 | 0.1 | 88.9 |
| 11234 | 18 | 0.1 | 89.0 |
| 21333 | 18 | 0.1 | 89.0 |
| 31111 | 18 | 0.1 | 89.1 |
| 31431 | 18 | 0.1 | 89.2 |
| 41441 | 18 | 0.1 | 89.2 |
| 43342 | 18 | 0.1 | 89.3 |
| 11114 | 17 | 0.1 | 89.4 |
| 11134 | 17 | 0.1 | 89.4 |
| 11242 | 17 | 0.1 | 89.5 |
| 11323 | 17 | 0.1 | 89.6 |
| 21234 | 17 | 0.1 | 89.6 |
| 22331 | 17 | 0.1 | 89.7 |
| 22333 | 17 | 0.1 | 89.8 |
| 32221 | 17 | 0.1 | 89.8 |
| 42432 | 17 | 0.1 | 89.9 |
| 11142 | 16 | 0.1 | 90.0 |
| 12232 | 16 | 0.1 | 90.0 |
| 22233 | 16 | 0.1 | 90.1 |
| 41241 | 16 | 0.1 | 90.1 |
| 41342 | 16 | 0.1 | 90.2 |
| 55522 | 16 | 0.1 | 90.3 |
| 11213 | 15 | 0.1 | 90.3 |
| 21142 | 15 | 0.1 | 90.4 |
| 21243 | 15 | 0.1 | 90.4 |
| 32241 | 15 | 0.1 | 90.5 |
| 32322 | 15 | 0.1 | 90.6 |
| 33443 | 15 | 0.1 | 90.6 |
| 41341 | 15 | 0.1 | 90.7 |

|       |     |     |      |
|-------|-----|-----|------|
| 11313 | 14  | 0.1 | 90.7 |
| 21141 | 14  | 0.1 | 90.8 |
| 21342 | 14  | 0.1 | 90.8 |
| 22322 | 14  | 0.1 | 90.9 |
| 31243 | 14  | 0.1 | 90.9 |
| 31343 | 14  | 0.1 | 91.0 |
| 41432 | 14  | 0.1 | 91.1 |
| 42332 | 14  | 0.1 | 91.1 |
| 42342 | 14  | 0.1 | 91.2 |
| 43444 | 14  | 0.1 | 91.2 |
| 44444 | 14  | 0.1 | 91.3 |
| 55533 | 14  | 0.1 | 91.3 |
| 11241 | 13  | 0.1 | 91.4 |
| 32242 | 13  | 0.1 | 91.4 |
| 32321 | 13  | 0.1 | 91.5 |
| 32341 | 13  | 0.1 | 91.5 |
| 32432 | 13  | 0.1 | 91.6 |
| 33342 | 13  | 0.1 | 91.6 |
| 42443 | 13  | 0.1 | 91.7 |
| 43433 | 13  | 0.1 | 91.7 |
| 44432 | 13  | 0.1 | 91.8 |
| 55531 | 13  | 0.1 | 91.8 |
| 11334 | 12  | 0.0 | 91.9 |
| 22223 | 12  | 0.0 | 91.9 |
| 31311 | 12  | 0.0 | 92.0 |
| 31442 | 12  | 0.0 | 92.0 |
| 33431 | 12  | 0.0 | 92.1 |
| 41242 | 12  | 0.0 | 92.1 |
| 41443 | 12  | 0.0 | 92.1 |
| 43431 | 12  | 0.0 | 92.2 |
| 12111 | 11  | 0.0 | 92.2 |
| 21341 | 11  | 0.0 | 92.3 |
| 21432 | 11  | 0.0 | 92.3 |
| 22211 | 11  | 0.0 | 92.4 |
| 31432 | 11  | 0.0 | 92.4 |
| 32442 | 11  | 0.0 | 92.4 |
| 33322 | 11  | 0.0 | 92.5 |
| 43333 | 11  | 0.0 | 92.5 |
| 11143 | 10  | 0.0 | 92.6 |
| 11343 | 10  | 0.0 | 92.6 |
| 22242 | 10  | 0.0 | 92.7 |
| 32433 | 10  | 0.0 | 92.7 |
| 32443 | 10  | 0.0 | 92.7 |
| 33432 | 10  | 0.0 | 92.8 |
| 41132 | 10  | 0.0 | 92.8 |
| 41442 | 10  | 0.0 | 92.8 |
| 44433 | 10  | 0.0 | 92.9 |
| 55542 | 10  | 0.0 | 92.9 |
| ...   | ... | ... | ...  |
| 55555 | 6   | 0.0 | -    |

In total 896 health states were reported in Life & Health 2017  
174 health states were reported by ten or more respondents  
291 health states were reported by five or more respondents

**Table S4** Problems in EQ-5D-5L dimensions (%), mean and median EQ VAS score, mean TTO index value, and mean VAS index value, total sample, by age group (n=25,867)

| EQ-5D-5L dimension                 | Men and women age group (years) |               |               |               |               |               |               |               |               |               |               |               |               |               |               |
|------------------------------------|---------------------------------|---------------|---------------|---------------|---------------|---------------|---------------|---------------|---------------|---------------|---------------|---------------|---------------|---------------|---------------|
|                                    | Total                           | 30-34         | 35-39         | 40-44         | 45-49         | 50-54         | 55-59         | 60-64         | 65-69         | 70-74         | 75-79         | 80-84         | 85-89         | 90-94         | 95-104        |
|                                    | n=25,867                        | n=1,127       | n=1,202       | n=1,473       | n=1,722       | n=1,824       | n=1,917       | n=2,144       | n=2,647       | n=4,489       | n=2,972       | n=1,723       | n=1,762       | n=703         | n=162         |
| <b>Mobility</b>                    |                                 |               |               |               |               |               |               |               |               |               |               |               |               |               |               |
| No problems                        | 67.6                            | 89.1          | 89.7          | 87.7          | 84.5          | 80.1          | 76.3          | 73.0          | 72.0          | 67.5          | 58.0          | 45.7          | 31.5          | 21.8          | 11.7          |
| Slight problems                    | 17.2                            | 8.0           | 8.0           | 8.6           | 11.2          | 12.1          | 14.1          | 17.2          | 17.4          | 18.5          | 22.3          | 25.2          | 28.0          | 24.9          | 19.1          |
| Moderate problems                  | 9.7                             | 2.2           | 1.7           | 2.6           | 3.1           | 5.6           | 6.6           | 6.9           | 6.8           | 9.7           | 13.2          | 18.6          | 23.6          | 29.6          | 21.6          |
| Severe problems                    | 4.4                             | 0.5           | 0.6           | 1.0           | 1.0           | 2.0           | 2.8           | 2.5           | 3.2           | 3.4           | 5.7           | 8.4           | 12.9          | 16.8          | 26.5          |
| Extreme problems                   | 1.2                             | 0.2           | 0.1           | 0.1           | 0.2           | 0.2           | 0.2           | 0.4           | 0.6           | 1.0           | 0.9           | 2.2           | 4.0           | 7.0           | 21.0          |
| <b>Self-care</b>                   |                                 |               |               |               |               |               |               |               |               |               |               |               |               |               |               |
| No problems                        | 89.2                            | 96.4          | 98.3          | 96.2          | 95.6          | 93.4          | 92.1          | 92.7          | 93.1          | 91.1          | 88.0          | 81.0          | 72.4          | 55.5          | 34.0          |
| Slight problems                    | 6.0                             | 2.9           | 1.3           | 2.6           | 3.0           | 4.8           | 5.7           | 4.8           | 4.5           | 5.8           | 7.3           | 10.4          | 11.3          | 16.1          | 15.4          |
| Moderate problems                  | 2.8                             | 0.7           | 0.2           | 0.7           | 1.0           | 1.5           | 1.7           | 1.6           | 1.6           | 1.9           | 3.0           | 4.9           | 9.1           | 15.2          | 14.8          |
| Severe problems                    | 1.1                             | 0.0           | 0.0           | 0.4           | 0.2           | 0.2           | 0.4           | 0.6           | 0.7           | 0.6           | 1.1           | 2.2           | 4.2           | 6.5           | 16.0          |
| Extreme problems                   | 0.8                             | 0.0           | 0.1           | 0.1           | 0.1           | 0.0           | 0.1           | 0.3           | 0.1           | 0.6           | 0.6           | 1.6           | 3.1           | 6.7           | 19.8          |
| <b>Usual activities</b>            |                                 |               |               |               |               |               |               |               |               |               |               |               |               |               |               |
| No problems                        | 69.2                            | 81.1          | 83.0          | 81.2          | 78.9          | 76.9          | 73.6          | 72.3          | 75.3          | 73.4          | 64.4          | 52.8          | 41.3          | 28.6          | 19.1          |
| Slight problems                    | 18.2                            | 13.3          | 11.2          | 12.1          | 14.5          | 13.9          | 17.0          | 18.9          | 17.2          | 17.1          | 21.9          | 26.0          | 27.6          | 24.9          | 22.2          |
| Moderate problems                  | 7.1                             | 4.0           | 3.7           | 4.2           | 3.9           | 5.2           | 5.1           | 5.2           | 4.4           | 6.1           | 8.5           | 12.9          | 16.2          | 20.5          | 13.0          |
| Severe problems                    | 3.6                             | 2.0           | 1.8           | 2.0           | 2.2           | 3.1           | 3.4           | 3.0           | 2.5           | 2.1           | 3.6           | 4.8           | 8.7           | 13.7          | 16.7          |
| Extreme problems                   | 2.0                             | 0.6           | 0.3           | 0.5           | 0.6           | 1.0           | 0.9           | 0.6           | 0.6           | 1.3           | 1.6           | 3.5           | 6.2           | 12.4          | 29.0          |
| <b>Pain/discomfort</b>             |                                 |               |               |               |               |               |               |               |               |               |               |               |               |               |               |
| No problems                        | 32.0                            | 49.2          | 49.2          | 42.4          | 40.3          | 34.6          | 31.4          | 30.0          | 30.1          | 32.1          | 26.8          | 22.7          | 20.0          | 16.5          | 15.4          |
| Slight problems                    | 39.8                            | 36.6          | 37.5          | 40.7          | 37.8          | 40.7          | 41.1          | 42.1          | 43.0          | 40.2          | 40.8          | 38.3          | 36.2          | 35.7          | 32.1          |
| Moderate problems                  | 22.5                            | 10.8          | 10.7          | 13.2          | 17.1          | 18.1          | 20.8          | 22.7          | 22.7          | 22.5          | 26.6          | 31.2          | 34.3          | 37.3          | 39.5          |
| Severe problems                    | 5.2                             | 3.1           | 2.3           | 3.5           | 4.1           | 5.9           | 6.1           | 4.9           | 4.0           | 4.7           | 5.3           | 7.2           | 8.6           | 9.8           | 11.1          |
| Extreme problems                   | 0.4                             | 0.3           | 0.2           | 0.1           | 0.7           | 0.7           | 0.6           | 0.3           | 0.2           | 0.4           | 0.4           | 0.6           | 0.8           | 0.7           | 1.8           |
| <b>Anxiety/depression</b>          |                                 |               |               |               |               |               |               |               |               |               |               |               |               |               |               |
| No problems                        | 62.8                            | 48.4          | 54.2          | 55.3          | 59.5          | 58.0          | 64.3          | 67.3          | 71.6          | 68.7          | 65.8          | 63.0          | 57.1          | 54.5          | 43.8          |
| Slight problems                    | 28.8                            | 35.6          | 34.6          | 33.1          | 30.8          | 31.8          | 26.3          | 26.1          | 23.6          | 25.9          | 27.9          | 28.4          | 32.4          | 34.8          | 34.6          |
| Moderate problems                  | 6.0                             | 10.5          | 7.9           | 8.5           | 6.6           | 7.0           | 6.5           | 4.4           | 3.7           | 4.0           | 5.2           | 6.0           | 7.8           | 7.4           | 16.0          |
| Severe problems                    | 2.0                             | 4.2           | 2.6           | 2.4           | 2.5           | 2.8           | 2.4           | 1.8           | 0.9           | 1.3           | 0.8           | 2.3           | 2.2           | 3.3           | 4.9           |
| Extreme problems                   | 0.4                             | 1.3           | 0.7           | 0.7           | 0.6           | 0.4           | 0.4           | 0.5           | 0.2           | 0.2           | 0.3           | 0.3           | 0.5           | 0.0           | 0.6           |
| <b>EQ VAS score (mean) [SD]</b>    | 76.1 [18.7]                     | 79.0 [16.0]   | 78.6 [16.0]   | 78.4 [16.7]   | 78.1 [17.1]   | 77.6 [17.8]   | 78.0 [18.2]   | 78.8 [17.1]   | 79.8 [16.9]   | 78.3 [17.8]   | 74.6 [18.5]   | 70.0 [20.0]   | 64.9 [21.2]   | 60.1 [22.6]   | 55.1 [24.1]   |
| <b>EQ VAS score (median) [IQR]</b> | 80.0 [20.0]                     | 80.0 [19.0]   | 80.0 [20.0]   | 80.0 [20.0]   | 80.0 [20.0]   | 80.0 [20.0]   | 80.0 [20.0]   | 80.0 [20.0]   | 85.0 [15.0]   | 80.0 [20.0]   | 80.0 [25.0]   | 75.0 [25.0]   | 70.0 [30.0]   | 60.0 [30.0]   | 55.0 [40.0]   |
| <b>TTO index value (mean) [SD]</b> | 0.892 [0.114]                   | 0.911 [0.099] | 0.922 [0.086] | 0.916 [0.093] | 0.913 [0.100] | 0.903 [0.109] | 0.901 [0.111] | 0.904 [0.103] | 0.912 [0.094] | 0.904 [0.103] | 0.887 [0.110] | 0.858 [0.130] | 0.824 [0.143] | 0.783 [0.149] | 0.718 [0.164] |
| <b>VAS index value (mean) [SD]</b> | 75.9 [14.0]                     | 78.4 [12.3]   | 79.8 [11.0]   | 78.9 [11.7]   | 78.6 [12.2]   | 77.4 [13.2]   | 77.1 [13.4]   | 77.4 [12.7]   | 78.2 [12.0]   | 77.3 [13.0]   | 75.0 [13.7]   | 71.5 [15.6]   | 67.4 [16.8]   | 62.7 [17.2]   | 54.6 [18.9]   |

**Table S5** Problems in EQ-5D-5L dimensions (%), mean and median EQ VAS score, mean TTO index value, and mean VAS index value, by sex, 30–64 years, by economic activity (n=11,303)

| EQ-5D-5L dimension                 | Total sample (%) |                          |               |               |               | Men (%)       |                          |               |               |               | Women (%)     |                          |               |               |               |
|------------------------------------|------------------|--------------------------|---------------|---------------|---------------|---------------|--------------------------|---------------|---------------|---------------|---------------|--------------------------|---------------|---------------|---------------|
|                                    | Employed         | Studying /parental leave | Unemployed    | Retired       | Sick leave    | Employed      | Studying /parental leave | Unemployed    | Retired       | Sick leave    | Employed      | Studying /parental leave | Unemployed    | Retired       | Sick leave    |
|                                    | n=9,549          | n=403                    | n=394         | n=122         | n=835         | n=4,252       | n=107                    | n=183         | n=59          | n=257         | n=5,297       | n=296                    | n=211         | n=63          | n=578         |
| <b>Mobility</b>                    |                  |                          |               |               |               |               |                          |               |               |               |               |                          |               |               |               |
| No problems                        | 85.3             | 86.6                     | 61.7          | 72.1          | 48.7          | 86.5          | 85.1                     | 65.6          | 76.3          | 48.6          | 84.3          | 87.2                     | 58.3          | 68.3          | 48.8          |
| Slight problems                    | 10.8             | 7.9                      | 20.6          | 18.0          | 22.3          | 10.0          | 8.4                      | 16.4          | 17.0          | 19.1          | 11.5          | 7.8                      | 24.2          | 19.1          | 23.7          |
| Moderate problems                  | 3.1              | 3.0                      | 12.4          | 5.7           | 17.7          | 2.8           | 3.7                      | 11.5          | 1.7           | 19.8          | 3.3           | 2.7                      | 13.3          | 9.5           | 16.8          |
| Severe problems                    | 0.7              | 2.5                      | 4.8           | 4.1           | 9.3           | 0.7           | 2.8                      | 6.0           | 5.1           | 10.9          | 0.8           | 2.4                      | 3.8           | 3.2           | 8.7           |
| Extreme problems                   | 0.1              | 0.0                      | 0.5           | 0.0           | 1.9           | 0.1           | 0.0                      | 0.6           | 0.0           | 1.6           | 0.1           | 0.0                      | 0.5           | 0.0           | 2.1           |
| <b>Self-care</b>                   |                  |                          |               |               |               |               |                          |               |               |               |               |                          |               |               |               |
| No problems                        | 96.9             | 97.5                     | 84.5          | 95.1          | 71.7          | 96.7          | 95.3                     | 85.8          | 93.2          | 69.3          | 97.1          | 98.3                     | 83.4          | 96.8          | 72.8          |
| Slight problems                    | 2.6              | 1.5                      | 10.7          | 2.5           | 16.7          | 2.8           | 2.8                      | 8.7           | 5.1           | 18.3          | 2.5           | 1.0                      | 12.3          | 0.0           | 15.9          |
| Moderate problems                  | 0.4              | 0.5                      | 3.8           | 1.6           | 8.3           | 0.5           | 0.9                      | 3.8           | 1.7           | 10.5          | 0.4           | 0.3                      | 3.8           | 1.6           | 7.3           |
| Severe problems                    | 0.1              | 0.5                      | 0.8           | 0.0           | 2.5           | 0.1           | 0.9                      | 1.1           | 0.0           | 1.2           | 0.1           | 0.3                      | 0.5           | 0.0           | 3.1           |
| Extreme problems                   | 0.0              | 0.0                      | 0.3           | 0.8           | 0.8           | 0.0           | 0.0                      | 0.6           | 0.0           | 0.8           | 0.0           | 0.0                      | 0.0           | 1.6           | 0.9           |
| <b>Usual activities</b>            |                  |                          |               |               |               |               |                          |               |               |               |               |                          |               |               |               |
| No problems                        | 81.8             | 80.7                     | 57.4          | 73.8          | 35.5          | 84.4          | 82.2                     | 60.1          | 79.7          | 36.6          | 79.7          | 80.1                     | 55.0          | 68.3          | 35.0          |
| Slight problems                    | 13.7             | 12.9                     | 21.3          | 21.3          | 23.7          | 12.1          | 9.4                      | 21.3          | 15.3          | 28.0          | 15.0          | 14.2                     | 21.3          | 27.0          | 21.8          |
| Moderate problems                  | 3.2              | 4.7                      | 11.4          | 3.3           | 17.7          | 2.3           | 6.5                      | 10.4          | 5.1           | 14.0          | 3.8           | 4.1                      | 12.3          | 1.6           | 19.4          |
| Severe problems                    | 1.1              | 1.7                      | 8.1           | 1.6           | 17.6          | 0.9           | 1.9                      | 6.0           | 0.0           | 15.2          | 1.3           | 1.7                      | 10.0          | 3.2           | 18.7          |
| Extreme problems                   | 0.2              | 0.0                      | 1.8           | 0.0           | 5.5           | 0.3           | 0.0                      | 2.2           | 0.0           | 6.2           | 0.2           | 0.0                      | 1.4           | 0.0           | 5.2           |
| <b>Pain/discomfort</b>             |                  |                          |               |               |               |               |                          |               |               |               |               |                          |               |               |               |
| No problems                        | 39.9             | 48.4                     | 28.9          | 32.0          | 16.7          | 44.2          | 56.1                     | 35.5          | 40.7          | 19.5          | 36.5          | 45.6                     | 23.2          | 23.8          | 15.4          |
| Slight problems                    | 41.6             | 34.2                     | 35.3          | 41.8          | 24.6          | 40.6          | 31.8                     | 31.2          | 33.9          | 26.9          | 42.4          | 35.1                     | 38.9          | 49.2          | 23.5          |
| Moderate problems                  | 15.6             | 13.4                     | 22.8          | 24.6          | 32.9          | 13.0          | 9.4                      | 20.8          | 23.7          | 32.3          | 17.7          | 14.9                     | 24.6          | 25.4          | 33.2          |
| Severe problems                    | 2.7              | 3.5                      | 10.2          | 1.6           | 22.6          | 2.0           | 2.8                      | 9.8           | 1.7           | 18.3          | 3.3           | 3.7                      | 10.4          | 1.6           | 24.6          |
| Extreme problems                   | 0.1              | 0.5                      | 2.8           | 0.0           | 3.2           | 0.1           | 0.0                      | 2.7           | 0.0           | 3.1           | 0.1           | 0.7                      | 2.8           | 0.0           | 3.3           |
| <b>Anxiety/depression</b>          |                  |                          |               |               |               |               |                          |               |               |               |               |                          |               |               |               |
| No problems                        | 62.6             | 52.6                     | 32.2          | 77.9          | 36.1          | 68.7          | 57.0                     | 36.6          | 79.7          | 37.7          | 57.8          | 51.0                     | 28.4          | 76.2          | 35.3          |
| Slight problems                    | 30.0             | 33.3                     | 39.3          | 21.3          | 30.9          | 25.7          | 33.6                     | 32.2          | 20.3          | 29.6          | 33.5          | 33.1                     | 45.5          | 22.2          | 31.5          |
| Moderate problems                  | 5.7              | 9.4                      | 15.7          | 0.8           | 17.8          | 4.3           | 6.5                      | 16.9          | 0.0           | 21.4          | 6.8           | 10.5                     | 14.7          | 1.6           | 16.3          |
| Severe problems                    | 1.5              | 4.2                      | 8.1           | 0.0           | 11.7          | 1.2           | 2.8                      | 8.2           | 0.0           | 9.0           | 1.7           | 4.7                      | 8.1           | 0.0           | 13.0          |
| Extreme problems                   | 0.2              | 0.5                      | 4.6           | 0.0           | 3.5           | 0.2           | 0.0                      | 6.0           | 0.0           | 2.3           | 0.2           | 0.7                      | 3.3           | 0.0           | 4.0           |
| <b>EQ VAS score (mean) [SD]</b>    | 80.3 [14.8]      | 77.7 [17.6]              | 68.1 [23.1]   | 80.9 [13.4]   | 59.4 [24.3]   | 81.3 [14.0]   | 80.6 [15.3]              | 66.8 [25.0]   | 80.2 [15.1]   | 61.8 [24.4]   | 79.6 [15.5]   | 76.7 [18.3]              | 69.2 [21.4]   | 81.6 [11.7]   | 58.4 [24.2]   |
| <b>EQ VAS score (median) [IQR]</b> | 83.0 [15.0]      | 80.0 [20.0]              | 75.0 [35.0]   | 85.0 [20.0]   | 60.0 [40.0]   | 85.0 [15.0]   | 85.0 [15.0]              | 75.0 [38.5]   | 80.0 [20.0]   | 69.5 [40.0]   | 80.0 [17.0]   | 80.0 [20.0]              | 75.0 [35.0]   | 85.0 [20.0]   | 60.0 [40.0]   |
| <b>TTO index value (mean) [SD]</b> | 0.924 [0.077]    | 0.912 [0.095]            | 0.832 [0.159] | 0.921 [0.077] | 0.768 [0.171] | 0.932 [0.073] | 0.920 [0.090]            | 0.836 [0.165] | 0.928 [0.075] | 0.782 [0.169] | 0.918 [0.080] | 0.909 [0.097]            | 0.828 [0.154] | 0.914 [0.079] | 0.762 [0.172] |
| <b>VAS index value (mean) [SD]</b> | 79.9 [10.2]      | 78.5 [12.0]              | 68.8 [18.0]   | 79.4 [10.5]   | 61.6 [18.7]   | 81.1 [9.6]    | 79.7 [11.4]              | 69.3 [18.9]   | 80.4 [10.4]   | 63.1 [18.6]   | 78.9 [10.5]   | 78.1 [12.3]              | 68.4 [17.3]   | 78.4 [10.6]   | 61.0 [18.7]   |

**Table S6** Problems in EQ-5D-5L dimensions (%), mean and median EQ VAS score, mean TTO index value, and mean VAS index value, total sample, by diseases diagnosed by a physician and by self-reported conditions, 30–104 years

| EQ-5D-5L dimension                 | Diseases diagnosed by a physician |               |               |               |               | Self-reported conditions |                             |                                |                       |                                  |               |               |               |               |                       |
|------------------------------------|-----------------------------------|---------------|---------------|---------------|---------------|--------------------------|-----------------------------|--------------------------------|-----------------------|----------------------------------|---------------|---------------|---------------|---------------|-----------------------|
|                                    | Asthma                            | COPD          | Depression    | Diabetes      | Hyper-tension | Headache or migraine     | Ache/pain in shoulders/neck | Ache/pain in elbows/legs/knees | Ache/pain in back/hip | Recurrent stomach/bowel problems | Eczema        | Dejection     | Anxiety/worry | Tiredness     | Sleeping difficulties |
|                                    | n=1,803                           | n=870         | n=1,891       | n=2,575       | n=8,321       | n=4,649                  | n=12,312                    | n=12,692                       | n=12,937              | n=6,473                          | n=3,346       | n=6,372       | n=6,791       | n=12,121      | n=8,944               |
| <b>Mobility</b>                    |                                   |               |               |               |               |                          |                             |                                |                       |                                  |               |               |               |               |                       |
| No problems                        | 58.0                              | 33.9          | 47.0          | 46.8          | 53.2          | 65.1                     | 61.4                        | 52.7                           | 55.8                  | 53.4                             | 62.2          | 53.1          | 56.4          | 54.7          | 56.8                  |
| Slight problems                    | 20.5                              | 27.1          | 20.2          | 23.8          | 23.1          | 18.7                     | 20.1                        | 24.6                           | 22.9                  | 22.7                             | 19.6          | 20.7          | 19.8          | 21.7          | 21.6                  |
| Moderate problems                  | 13.2                              | 22.1          | 18.6          | 16.7          | 15.2          | 9.7                      | 12.0                        | 14.5                           | 13.7                  | 13.8                             | 10.3          | 14.9          | 13.5          | 14.3          | 13.3                  |
| Severe problems                    | 6.6                               | 13.5          | 10.5          | 10.1          | 7.2           | 5.2                      | 5.2                         | 6.9                            | 6.4                   | 7.7                              | 6.6           | 8.5           | 7.9           | 7.4           | 6.9                   |
| Extreme problems                   | 1.7                               | 3.5           | 3.8           | 2.6           | 1.4           | 1.3                      | 1.3                         | 1.5                            | 1.3                   | 2.4                              | 1.4           | 2.9           | 2.5           | 1.9           | 1.4                   |
| <b>Self-care</b>                   |                                   |               |               |               |               |                          |                             |                                |                       |                                  |               |               |               |               |                       |
| No problems                        | 85.2                              | 71.8          | 70.9          | 78.2          | 84.3          | 86.3                     | 85.8                        | 84.1                           | 85.0                  | 80.6                             | 85.5          | 78.2          | 80.2          | 82.1          | 84.0                  |
| Slight problems                    | 8.4                               | 14.9          | 13.9          | 12.1          | 8.8           | 7.4                      | 8.1                         | 8.9                            | 8.6                   | 10.1                             | 7.6           | 10.8          | 9.9           | 9.6           | 8.8                   |
| Moderate problems                  | 3.8                               | 7.6           | 8.5           | 5.3           | 4.2           | 3.8                      | 3.8                         | 4.3                            | 4.0                   | 5.1                              | 4.0           | 6.0           | 5.3           | 4.8           | 4.5                   |
| Severe problems                    | 1.6                               | 3.1           | 4.4           | 2.8           | 1.6           | 1.7                      | 1.5                         | 1.6                            | 1.5                   | 2.4                              | 1.6           | 2.9           | 2.7           | 2.0           | 1.7                   |
| Extreme problems                   | 1.0                               | 2.5           | 2.3           | 1.6           | 1.0           | 0.8                      | 0.9                         | 1.0                            | 1.0                   | 1.8                              | 1.2           | 2.1           | 2.0           | 1.5           | 1.0                   |
| <b>Usual activities</b>            |                                   |               |               |               |               |                          |                             |                                |                       |                                  |               |               |               |               |                       |
| No problems                        | 56.9                              | 37.6          | 35.0          | 52.8          | 59.0          | 60.1                     | 60.9                        | 56.2                           | 58.0                  | 52.3                             | 62.6          | 48.3          | 51.5          | 53.2          | 55.8                  |
| Slight problems                    | 24.4                              | 30.5          | 28.3          | 24.9          | 23.7          | 21.6                     | 22.9                        | 25.4                           | 24.5                  | 24.6                             | 20.6          | 25.2          | 24.3          | 25.5          | 24.3                  |
| Moderate problems                  | 10.2                              | 16.4          | 17.0          | 11.7          | 9.8           | 9.5                      | 9.4                         | 10.5                           | 9.8                   | 12.0                             | 8.8           | 13.3          | 12.0          | 11.6          | 11.1                  |
| Severe problems                    | 6.1                               | 10.6          | 13.6          | 6.8           | 5.0           | 6.2                      | 4.7                         | 5.4                            | 5.4                   | 7.0                              | 5.5           | 8.6           | 7.9           | 6.4           | 6.3                   |
| Extreme problems                   | 2.5                               | 4.9           | 6.1           | 3.7           | 2.5           | 2.5                      | 2.2                         | 2.5                            | 2.3                   | 4.0                              | 2.5           | 4.6           | 4.3           | 3.3           | 2.6                   |
| <b>Pain/discomfort</b>             |                                   |               |               |               |               |                          |                             |                                |                       |                                  |               |               |               |               |                       |
| No problems                        | 20.0                              | 15.4          | 13.5          | 20.9          | 22.2          | 19.7                     | 14.8                        | 10.9                           | 12.0                  | 14.7                             | 23.5          | 17.3          | 18.8          | 18.8          | 19.4                  |
| Slight problems                    | 38.6                              | 31.4          | 30.4          | 36.5          | 40.3          | 38.9                     | 44.7                        | 45.7                           | 45.2                  | 38.6                             | 41.7          | 36.9          | 37.7          | 39.5          | 38.4                  |
| Moderate problems                  | 30.6                              | 39.8          | 37.5          | 32.0          | 29.5          | 29.5                     | 31.7                        | 34.0                           | 33.2                  | 34.4                             | 25.9          | 33.1          | 31.8          | 31.7          | 31.4                  |
| Severe problems                    | 9.2                               | 11.2          | 15.9          | 9.7           | 7.5           | 10.7                     | 8.1                         | 8.7                            | 8.8                   | 11.3                             | 8.1           | 11.3          | 10.4          | 9.1           | 9.8                   |
| Extreme problems                   | 1.6                               | 2.3           | 2.7           | 0.9           | 0.6           | 1.2                      | 0.7                         | 0.8                            | 0.8                   | 1.0                              | 0.8           | 1.3           | 1.2           | 0.9           | 1.0                   |
| <b>Anxiety/depression</b>          |                                   |               |               |               |               |                          |                             |                                |                       |                                  |               |               |               |               |                       |
| No problems                        | 53.6                              | 49.1          | 5.1           | 60.1          | 61.9          | 42.1                     | 53.1                        | 55.1                           | 54.7                  | 43.6                             | 54.2          | 5.1           | 7.4           | 42.5          | 43.1                  |
| Slight problems                    | 32.8                              | 36.1          | 39.3          | 29.8          | 29.4          | 39.3                     | 35.2                        | 33.7                           | 34.0                  | 39.1                             | 32.9          | 64.4          | 64.1          | 42.1          | 40.4                  |
| Moderate problems                  | 9.2                               | 10.2          | 33.8          | 7.0           | 6.3           | 12.2                     | 8.0                         | 7.9                            | 7.9                   | 11.8                             | 9.1           | 21.5          | 21.0          | 10.8          | 11.2                  |
| Severe problems                    | 3.7                               | 3.5           | 17.3          | 2.7           | 2.0           | 5.1                      | 3.1                         | 2.9                            | 2.9                   | 4.5                              | 3.3           | 7.5           | 7.0           | 3.8           | 4.3                   |
| Extreme problems                   | 0.6                               | 1.2           | 4.4           | 0.4           | 0.4           | 1.3                      | 0.6                         | 0.5                            | 0.5                   | 0.9                              | 0.7           | 1.5           | 1.5           | 0.8           | 1.0                   |
| <b>EQ VAS score (mean) [SD]</b>    | 70.2 (20.2)                       | 61.0 (21.7)   | 57.1 (22.1)   | 68.4 (20.0)   | 71.8 (19.4)   | 69.6 (20.8)              | 71.9 (19.3)                 | 71.1 (19.6)                    | 71.4 (19.4)           | 67.4 (20.8)                      | 72.1 (20.1)   | 64.0 (20.9)   | 65.5 (21.0)   | 68.2 (19.9)   | 69.3 (19.8)           |
| <b>EQ VAS score (median) [IQR]</b> | 75.0 [25.0]                       | 60.0 [30.0]   | 60.0 [35.0]   | 70.0 [30.0]   | 75.0 [25.0]   | 75.0 [25.0]              | 75.0 [25.0]                 | 75.0 [25.0]                    | 75.0 [25.0]           | 70.0 [33.5]                      | 75.0 [30.0]   | 70.0 [30.0]   | 70.0 [30.0]   | 75.0 [25.0]   | 75.0 [25.0]           |
| <b>TTO index value (mean) [SD]</b> | 0.857 (0.136)                     | 0.809 (0.151) | 0.744 (0.169) | 0.849 (0.137) | 0.869 (0.125) | 0.852 (0.141)            | 0.866 (0.126)               | 0.857 (0.128)                  | 0.861 (0.127)         | 0.837 (0.142)                    | 0.868 (0.134) | 0.805 (0.147) | 0.815 (0.146) | 0.846 (0.134) | 0.848 (0.136)         |
| <b>VAS index value (mean) [SD]</b> | 71.4 (15.9)                       | 65.4 (17.3)   | 58.2 (17.6)   | 70.4 (16.2)   | 72.8 (15.0)   | 70.8 (16.2)              | 72.3 (14.7)                 | 71.1 (14.9)                    | 71.5 (14.8)           | 68.7 (16.3)                      | 72.8 (15.7)   | 64.6 (16.1)   | 65.8 (16.1)   | 69.7 (15.6)   | 70.1 (15.6)           |

Comparing proportions of any problems (chi-square tests) and mean EQ VAS scores, TTO index values and VAS index values (independent t-tests) between groups with a specific disease or condition with groups without having the specific disease or condition showed statistically significant differences in all comparisons. Slight, moderate, severe and extreme problems were collapsed into any problems for the chi-square test.

**Table S7** Problems in EQ-5D-5L dimensions (%), mean and median EQ VAS score, mean TTO index value, and mean VAS index value, by sex, by Body Mass Index (BMI) groups, 30–104 years (n=24,694)

| EQ-5D-5L dimension                 | Total sample (%) |               |               |               |                |                 | Men (%)       |               |               |               |                |                 | Women (%)     |               |               |               |                |                 |
|------------------------------------|------------------|---------------|---------------|---------------|----------------|-----------------|---------------|---------------|---------------|---------------|----------------|-----------------|---------------|---------------|---------------|---------------|----------------|-----------------|
|                                    | BMI              |               |               |               |                |                 | BMI           |               |               |               |                |                 | BMI           |               |               |               |                |                 |
|                                    | Underweight      | Normal        | Overweight    | Obese class I | Obese class II | Obese class III | Underweight   | Normal        | Overweight    | Obese class I | Obese class II | Obese class III | Underweight   | Normal        | Overweight    | Obese class I | Obese class II | Obese class III |
| n=383                              | n=9,685          | n=9,785       | n=3,519       | n=886         | n=436          | n=134           | n=4,087       | n=5,307       | n=1,684       | n=373         | n=178          | n=249           | n=5,598       | n=4,478       | n=1,835       | n=513         | n=258          |                 |
| <b>Mobility</b>                    |                  |               |               |               |                |                 |               |               |               |               |                |                 |               |               |               |               |                |                 |
| No problems                        | 58.8             | 76.2          | 68.3          | 56.3          | 46.5           | 40.6            | 53.0          | 73.7          | 70.3          | 59.3          | 49.1           | 39.3            | 61.9          | 78.1          | 66.0          | 53.5          | 44.6           | 41.5            |
| Slight problems                    | 18.0             | 13.3          | 17.8          | 22.6          | 23.7           | 26.8            | 17.2          | 13.6          | 16.4          | 19.6          | 20.6           | 28.1            | 18.5          | 13.0          | 19.3          | 25.3          | 25.9           | 26.0            |
| Moderate problems                  | 10.4             | 6.7           | 9.5           | 13.8          | 18.1           | 17.7            | 17.2          | 7.8           | 8.9           | 13.4          | 17.4           | 16.9            | 6.8           | 5.9           | 10.2          | 14.1          | 18.5           | 18.2            |
| Severe problems                    | 7.8              | 2.9           | 3.5           | 6.3           | 9.9            | 12.6            | 9.0           | 3.9           | 3.5           | 6.6           | 11.5           | 12.9            | 7.2           | 2.2           | 3.6           | 6.0           | 8.8            | 12.4            |
| Extreme problems                   | 5.0              | 0.9           | 0.9           | 1.1           | 1.8            | 2.3             | 3.7           | 1.0           | 0.9           | 1.1           | 1.3            | 2.8             | 5.6           | 0.8           | 0.9           | 1.1           | 2.1            | 1.9             |
| <b>Self-care</b>                   |                  |               |               |               |                |                 |               |               |               |               |                |                 |               |               |               |               |                |                 |
| No problems                        | 78.3             | 91.9          | 90.6          | 86.4          | 80.0           | 77.3            | 73.1          | 90.3          | 90.4          | 85.9          | 77.8           | 73.0            | 81.1          | 93.0          | 90.8          | 86.9          | 81.7           | 80.2            |
| Slight problems                    | 8.9              | 4.4           | 5.7           | 8.0           | 12.4           | 12.4            | 11.2          | 5.5           | 6.0           | 8.0           | 15.3           | 14.0            | 7.6           | 3.6           | 5.3           | 8.0           | 10.3           | 11.2            |
| Moderate problems                  | 6.3              | 2.2           | 2.3           | 3.7           | 4.6            | 5.7             | 9.0           | 2.4           | 2.1           | 4.2           | 4.3            | 6.2             | 4.8           | 2.0           | 2.5           | 3.2           | 4.9            | 5.4             |
| Severe problems                    | 2.9              | 0.9           | 0.9           | 1.2           | 1.8            | 2.8             | 3.7           | 1.1           | 0.9           | 1.1           | 1.9            | 3.4             | 2.4           | 0.8           | 0.9           | 1.2           | 1.8            | 2.3             |
| Extreme problems                   | 3.7              | 0.7           | 0.6           | 0.8           | 1.1            | 1.8             | 3.0           | 0.7           | 0.6           | 0.8           | 0.8            | 3.4             | 4.0           | 0.6           | 0.6           | 0.7           | 1.4            | 0.8             |
| <b>Usual activities</b>            |                  |               |               |               |                |                 |               |               |               |               |                |                 |               |               |               |               |                |                 |
| No problems                        | 58.5             | 75.0          | 70.9          | 60.9          | 51.6           | 49.1            | 57.5          | 74.3          | 73.4          | 63.7          | 54.4           | 49.4            | 59.0          | 75.5          | 67.9          | 58.3          | 49.5           | 48.8            |
| Slight problems                    | 18.0             | 15.0          | 18.2          | 24.1          | 25.7           | 26.6            | 18.7          | 15.2          | 16.6          | 22.2          | 22.3           | 25.3            | 17.7          | 14.8          | 20.1          | 25.8          | 28.3           | 27.5            |
| Moderate problems                  | 11.0             | 5.8           | 6.7           | 8.2           | 11.2           | 12.8            | 10.5          | 6.0           | 6.1           | 7.2           | 11.5           | 11.2            | 11.2          | 5.7           | 7.3           | 9.1           | 10.9           | 14.0            |
| Severe problems                    | 7.3              | 2.5           | 2.8           | 4.8           | 8.8            | 8.7             | 8.2           | 2.6           | 2.4           | 4.9           | 9.4            | 9.0             | 6.8           | 2.5           | 3.3           | 4.6           | 8.4            | 8.5             |
| Extreme problems                   | 5.2              | 1.7           | 1.5           | 2.1           | 2.7            | 2.8             | 5.2           | 1.9           | 1.5           | 2.0           | 2.4            | 5.1             | 5.2           | 1.6           | 1.4           | 2.1           | 2.9            | 1.2             |
| <b>Pain/discomfort</b>             |                  |               |               |               |                |                 |               |               |               |               |                |                 |               |               |               |               |                |                 |
| No problems                        | 33.2             | 38.0          | 31.3          | 23.6          | 17.3           | 17.4            | 36.6          | 40.2          | 35.7          | 28.6          | 22.0           | 21.9            | 31.3          | 36.4          | 26.2          | 19.0          | 13.8           | 14.3            |
| Slight problems                    | 35.3             | 40.3          | 40.8          | 39.1          | 37.0           | 37.6            | 29.9          | 39.9          | 40.4          | 39.1          | 36.2           | 37.1            | 38.2          | 40.6          | 41.2          | 39.1          | 37.6           | 38.0            |
| Moderate problems                  | 21.9             | 17.6          | 23.1          | 29.6          | 33.1           | 28.7            | 22.4          | 15.9          | 20.5          | 26.0          | 29.0           | 27.0            | 21.7          | 18.9          | 26.3          | 32.9          | 36.1           | 29.8            |
| Severe problems                    | 8.6              | 3.7           | 4.5           | 7.1           | 11.5           | 15.4            | 9.7           | 3.7           | 3.2           | 5.8           | 11.5           | 12.9            | 8.0           | 3.7           | 5.9           | 8.4           | 11.5           | 17.1            |
| Extreme problems                   | 1.0              | 0.3           | 0.3           | 0.6           | 1.1            | 0.9             | 1.5           | 0.3           | 0.2           | 0.5           | 1.3            | 1.1             | 0.8           | 0.3           | 0.4           | 0.7           | 1.0            | 0.8             |
| <b>Anxiety/depression</b>          |                  |               |               |               |                |                 |               |               |               |               |                |                 |               |               |               |               |                |                 |
| No problems                        | 57.4             | 63.8          | 65.0          | 60.3          | 55.0           | 45.6            | 64.9          | 69.3          | 69.6          | 67.0          | 63.0           | 47.8            | 53.4          | 59.7          | 59.5          | 54.2          | 49.1           | 44.2            |
| Slight problems                    | 28.7             | 28.8          | 27.6          | 29.9          | 29.9           | 40.6            | 20.2          | 24.7          | 24.7          | 24.9          | 23.3           | 38.8            | 33.3          | 31.8          | 31.1          | 34.4          | 34.7           | 41.9            |
| Moderate problems                  | 10.2             | 5.5           | 5.5           | 6.5           | 9.5            | 8.3             | 9.7           | 4.5           | 4.3           | 5.5           | 8.3            | 6.2             | 10.4          | 6.2           | 6.9           | 7.5           | 10.3           | 9.7             |
| Severe problems                    | 3.7              | 1.6           | 1.6           | 2.6           | 4.7            | 4.1             | 5.2           | 1.2           | 1.2           | 2.0           | 4.0            | 5.6             | 2.8           | 1.9           | 2.0           | 3.2           | 5.3            | 3.1             |
| Extreme problems                   | 0.0              | 0.4           | 0.3           | 0.6           | 0.9            | 1.4             | 0.0           | 0.3           | 0.2           | 0.5           | 1.3            | 1.7             | 0.0           | 0.5           | 0.4           | 0.7           | 0.6            | 1.2             |
| <b>EQ VAS score (mean) [SD]</b>    | 70.2 [23.2]      | 78.7 [17.9]   | 76.9 [17.6]   | 72.5 [19.0]   | 67.2 [19.5]    | 66.4 [20.2]     | 65.9 [25.3]   | 78.4 [18.0]   | 77.8 [17.1]   | 74.0 [18.2]   | 68.1 [19.6]    | 64.8 [21.7]     | 72.5 [21.7]   | 79.0 [17.9]   | 75.9 [18.2]   | 71.1 [19.7]   | 66.6 [19.5]    | 67.4 [19.2]     |
| <b>EQ VAS score (median) [IQR]</b> | 80.0 [37.0]      | 83.0 [20.0]   | 80.0 [20.0]   | 75.0 [25.0]   | 70.0 [29.0]    | 70.0 [30.0]     | 75.0 [35.0]   | 82.0 [20.0]   | 80.0 [20.0]   | 80.0 [23.0]   | 70.0 [29.0]    | 70.0 [30.0]     | 80.0 [30.0]   | 83.0 [20.0]   | 80.0 [20.0]   | 75.0 [25.0]   | 70.0 [30.0]    | 70.0 [30.0]     |
| <b>TTO index value (mean) [SD]</b> | 0.855 [0.150]    | 0.907 [0.104] | 0.899 [0.105] | 0.872 [0.122] | 0.839 [0.142]  | 0.828 [0.147]   | 0.847 [0.165] | 0.908 [0.105] | 0.907 [0.099] | 0.882 [0.119] | 0.846 [0.148]  | 0.825 [0.159]   | 0.859 [0.141] | 0.906 [0.103] | 0.889 [0.111] | 0.864 [0.124] | 0.835 [0.137]  | 0.831 [0.138]   |
| <b>VAS index value (mean) [SD]</b> | 71.8 [17.6]      | 77.9 [13.0]   | 76.6 [13.2]   | 73.2 [14.7]   | 69.1 [16.3]    | 67.8 [17.1]     | 71.4 [18.9]   | 78.2 [13.2]   | 77.8 [12.6]   | 74.6 [14.6]   | 70.1 [17.2]    | 67.8 [17.3]     | 71.9 [16.9]   | 77.6 [12.8]   | 75.2 [13.6]   | 71.9 [14.8]   | 68.4 [15.6]    | 67.8 [16.3]     |

**Table S8** Problems in EQ-5D-5L dimensions (%), mean and median EQ VAS score, mean TTO index value, and mean VAS index value, total sample, by self-reported stress and self-reported sickness (30–69 years), and number of diagnosed diseases (30–104 years)

| EQ-5D-5L dimension                 | Stress (30-69 years)             |               |                |               |               | Sick for more than 29 continuous days in the past 12 months (30-69 years) |                                                         |                                                  |                                                            |                                         |                          |                       | Number of diseases diagnosed by a physician (30-104 years) |               |               |               |
|------------------------------------|----------------------------------|---------------|----------------|---------------|---------------|---------------------------------------------------------------------------|---------------------------------------------------------|--------------------------------------------------|------------------------------------------------------------|-----------------------------------------|--------------------------|-----------------------|------------------------------------------------------------|---------------|---------------|---------------|
|                                    | Quite a lot/very much (combined) | Not at all    | To some extent | Quite a lot   | Very much     | No, I have not been sick for a continuous period of 29 days or more       | Yes, for problems with my back, neck, joints or muscles | Yes, for exhaustion, fatigue, depression, stress | Yes, for other mental health problems (including insomnia) | Yes, for cardiovascular disease, stroke | Yes for accident, injury | Yes for other reasons | One                                                        | Two           | Three         | Four or more  |
|                                    | n=1,676                          | n=6,142       | n=6,170        | n=1,285       | n=391         | n=9,151                                                                   | n=317                                                   | n=455                                            | n=120                                                      | n=60                                    | n=187                    | n=344                 | n=8,182                                                    | n=2,349       | n=383         | n=79          |
| <b>Mobility</b>                    |                                  |               |                |               |               |                                                                           |                                                         |                                                  |                                                            |                                         |                          |                       |                                                            |               |               |               |
| No problems                        | 64.9                             | 85.4          | 78.4           | 67.7          | 55.5          | 87.0                                                                      | 42.6                                                    | 71.4                                             | 54.2                                                       | 43.3                                    | 62.0                     | 62.5                  | 59.3                                                       | 44.9          | 33.2          | 16.5          |
| Slight problems                    | 18.5                             | 10.0          | 14.4           | 17.6          | 21.5          | 9.9                                                                       | 28.1                                                    | 15.8                                             | 23.3                                                       | 28.3                                    | 19.8                     | 21.5                  | 21.4                                                       | 25.5          | 21.4          | 20.3          |
| Moderate problems                  | 11.0                             | 3.2           | 5.0            | 10.3          | 13.6          | 2.5                                                                       | 20.8                                                    | 10.8                                             | 17.5                                                       | 16.7                                    | 11.2                     | 10.5                  | 12.6                                                       | 18.5          | 23.2          | 25.3          |
| Severe problems                    | 5.0                              | 1.1           | 2.0            | 4.0           | 8.4           | 0.6                                                                       | 7.9                                                     | 1.8                                              | 3.3                                                        | 8.3                                     | 5.4                      | 5.2                   | 5.5                                                        | 9.3           | 18.5          | 25.3          |
| Extreme problems                   | 0.6                              | 0.3           | 0.2            | 0.5           | 1.0           | 0.1                                                                       | 0.6                                                     | 0.2                                              | 1.7                                                        | 3.3                                     | 1.6                      | 0.3                   | 1.2                                                        | 1.8           | 3.7           | 12.7          |
| <b>Self-care</b>                   |                                  |               |                |               |               |                                                                           |                                                         |                                                  |                                                            |                                         |                          |                       |                                                            |               |               |               |
| No problems                        | 84.7                             | 96.9          | 94.3           | 86.5          | 79.0          | 97.6                                                                      | 72.9                                                    | 87.7                                             | 75.0                                                       | 81.7                                    | 86.6                     | 85.8                  | 87.1                                                       | 79.6          | 61.9          | 41.8          |
| Slight problems                    | 9.8                              | 2.2           | 4.2            | 9.2           | 11.8          | 2.1                                                                       | 18.0                                                    | 8.4                                              | 16.7                                                       | 13.3                                    | 9.1                      | 10.8                  | 7.5                                                        | 11.3          | 17.8          | 27.9          |
| Moderate problems                  | 4.1                              | 0.6           | 1.2            | 3.2           | 6.9           | 0.3                                                                       | 7.9                                                     | 3.3                                              | 5.8                                                        | 3.3                                     | 3.2                      | 2.9                   | 3.3                                                        | 5.5           | 12.8          | 11.4          |
| Severe problems                    | 1.2                              | 0.2           | 0.3            | 1.0           | 1.8           | 0.1                                                                       | 1.3                                                     | 0.0                                              | 2.5                                                        | 0.0                                     | 1.1                      | 0.6                   | 1.3                                                        | 2.6           | 5.5           | 8.9           |
| Extreme problems                   | 0.2                              | 0.1           | 0.1            | 0.2           | 0.5           | 0.0                                                                       | 0.0                                                     | 0.0                                              | 0.0                                                        | 1.7                                     | 0.0                      | 0.0                   | 0.9                                                        | 1.1           | 2.1           | 10.1          |
| <b>Usual activities</b>            |                                  |               |                |               |               |                                                                           |                                                         |                                                  |                                                            |                                         |                          |                       |                                                            |               |               |               |
| No problems                        | 49.6                             | 86.4          | 75.0           | 53.2          | 37.9          | 85.5                                                                      | 28.7                                                    | 39.3                                             | 25.0                                                       | 35.0                                    | 48.1                     | 54.1                  | 62.0                                                       | 49.3          | 32.4          | 19.0          |
| Slight problems                    | 24.2                             | 10.3          | 17.7           | 24.8          | 22.0          | 11.9                                                                      | 32.5                                                    | 29.2                                             | 27.5                                                       | 28.3                                    | 28.3                     | 25.3                  | 22.0                                                       | 28.7          | 27.9          | 26.6          |
| Moderate problems                  | 13.7                             | 2.0           | 4.6            | 12.9          | 16.1          | 1.9                                                                       | 23.3                                                    | 18.7                                             | 23.3                                                       | 18.3                                    | 12.8                     | 9.3                   | 9.4                                                        | 11.9          | 17.0          | 19.0          |
| Severe problems                    | 10.1                             | 0.9           | 2.2            | 7.3           | 19.2          | 0.6                                                                       | 12.6                                                    | 11.0                                             | 18.3                                                       | 11.7                                    | 6.4                      | 7.0                   | 4.5                                                        | 7.1           | 15.7          | 21.5          |
| Extreme problems                   | 2.5                              | 0.4           | 0.4            | 1.7           | 4.9           | 0.1                                                                       | 2.8                                                     | 1.8                                              | 5.8                                                        | 6.7                                     | 4.3                      | 4.4                   | 2.1                                                        | 3.0           | 7.1           | 13.9          |
| <b>Pain/discomfort</b>             |                                  |               |                |               |               |                                                                           |                                                         |                                                  |                                                            |                                         |                          |                       |                                                            |               |               |               |
| No problems                        | 19.5                             | 45.8          | 31.9           | 21.3          | 13.8          | 42.2                                                                      | 4.1                                                     | 21.8                                             | 16.7                                                       | 10.0                                    | 13.4                     | 20.6                  | 24.8                                                       | 16.7          | 8.4           | 11.4          |
| Slight problems                    | 32.9                             | 39.2          | 43.7           | 35.3          | 25.1          | 42.2                                                                      | 22.1                                                    | 36.3                                             | 23.3                                                       | 36.7                                    | 38.5                     | 35.5                  | 41.0                                                       | 36.9          | 29.0          | 19.0          |
| Moderate problems                  | 32.0                             | 12.9          | 19.8           | 30.9          | 35.6          | 13.7                                                                      | 46.1                                                    | 29.5                                             | 39.2                                                       | 38.3                                    | 34.2                     | 32.3                  | 27.2                                                       | 35.2          | 41.0          | 39.2          |
| Severe problems                    | 13.7                             | 1.9           | 4.4            | 11.5          | 20.7          | 1.9                                                                       | 26.5                                                    | 12.1                                             | 17.5                                                       | 11.7                                    | 12.3                     | 10.5                  | 6.5                                                        | 10.6          | 17.5          | 25.3          |
| Extreme problems                   | 1.9                              | 0.1           | 0.2            | 1.0           | 4.9           | 0.1                                                                       | 1.3                                                     | 0.4                                              | 3.3                                                        | 3.3                                     | 1.6                      | 1.2                   | 0.5                                                        | 0.6           | 4.2           | 5.1           |
| <b>Anxiety/depression</b>          |                                  |               |                |               |               |                                                                           |                                                         |                                                  |                                                            |                                         |                          |                       |                                                            |               |               |               |
| No problems                        | 13.1                             | 89.1          | 47.5           | 14.6          | 8.2           | 65.9                                                                      | 37.9                                                    | 17.6                                             | 3.3                                                        | 45.0                                    | 55.1                     | 48.6                  | 60.1                                                       | 51.5          | 25.6          | 25.3          |
| Slight problems                    | 38.8                             | 10.3          | 45.4           | 43.4          | 23.5          | 28.5                                                                      | 39.4                                                    | 42.2                                             | 34.2                                                       | 31.7                                    | 30.5                     | 36.3                  | 29.5                                                       | 33.1          | 35.3          | 32.9          |
| Moderate problems                  | 29.2                             | 0.4           | 6.1            | 30.4          | 25.3          | 4.5                                                                       | 15.1                                                    | 22.9                                             | 26.7                                                       | 11.7                                    | 11.2                     | 12.5                  | 7.1                                                        | 10.6          | 26.4          | 21.5          |
| Severe problems                    | 15.2                             | 0.2           | 0.9            | 10.4          | 31.0          | 1.1                                                                       | 6.0                                                     | 14.1                                             | 24.2                                                       | 6.7                                     | 2.7                      | 1.7                   | 2.6                                                        | 4.3           | 9.7           | 16.5          |
| Extreme problems                   | 3.8                              | 0.1           | 0.1            | 1.3           | 12.0          | 0.1                                                                       | 1.6                                                     | 3.3                                              | 11.7                                                       | 5.0                                     | 0.5                      | 0.9                   | 0.7                                                        | 0.5           | 3.1           | 3.8           |
| <b>EQ VAS score (mean) [SD]</b>    | 61.7 (21.4)                      | 84.5 (13.6)   | 77.3 (15.5)    | 64.8 (19.9)   | 51.5 (23.1)   | 81.6 (13.9)                                                               | 62.2 (21.6)                                             | 63.7 (20.8)                                      | 54.6 (21.2)                                                | 65.3 (20.6)                             | 70.5 (18.3)              | 68.6 (21.8)           | 72.8 (19.2)                                                | 67.0 (19.8)   | 54.9 (22.0)   | 51.2 (23.3)   |
| <b>EQ VAS score (median) [IQR]</b> | 65.0 [30.0]                      | 90.0 [15.0]   | 80.0 [20.0]    | 70.0 [30.0]   | 50.0 [35.0]   | 85.0 [15.0]                                                               | 65.0 [34.0]                                             | 70.0 [30.0]                                      | 50.0 [35.0]                                                | 70.0 [30.0]                             | 75.0 [23.0]              | 75.0 [35.0]           | 77.0 [28.0]                                                | 70.0 [30.0]   | 60.0 [35.0]   | 50.0 [35.0]   |
| <b>TTO index value (mean) [SD]</b> | 0.795 (0.159)                    | 0.943 (0.061) | 0.907 (0.087)  | 0.820 (0.139) | 0.710 (0.187) | 0.933 (0.066)                                                             | 0.780 (0.147)                                           | 0.803 (0.148)                                    | 0.714 (0.171)                                              | 0.797 (0.166)                           | 0.848 (0.129)            | 0.855 (0.124)         | 0.875 (0.121)                                              | 0.839 (0.136) | 0.748 (0.179) | 0.688 (0.189) |
| <b>VAS index value (mean) [SD]</b> | 64.0 (16.9)                      | 82.8 (8.4)    | 77.2 (11.2)    | 66.6 (15.2)   | 55.3 (19.1)   | 81.0 (9.0)                                                                | 62.2 (16.1)                                             | 65.3 (16.1)                                      | 55.4 (17.5)                                                | 64.0 (18.6)                             | 70.0 (15.1)              | 70.9 (15.0)           | 73.6 (14.6)                                                | 69.0 (15.8)   | 58.8 (19.0)   | 52.2 (20.4)   |

Comparing proportions of any problems (chi-square tests) and mean EQ VAS scores, TTO index values and VAS index values (independent t-tests) between groups with a specific condition with groups without having the specific condition and across different numbers of diseases showed statistically significant differences in all comparisons. Slight, moderate, severe and extreme problems were collapsed into any problems for the chi-square test.

**Table S9** Proportion of self-rated health (SRH) levels by sex, by age group (n=25,867)

| Self-rated health    | Age group (years) |         |         |         |         |         |         |         |         |         |         |         |         |       |        |
|----------------------|-------------------|---------|---------|---------|---------|---------|---------|---------|---------|---------|---------|---------|---------|-------|--------|
|                      | Total sample      | 30-34   | 35-39   | 40-44   | 45-49   | 50-54   | 55-59   | 60-64   | 65-69   | 70-74   | 75-79   | 80-84   | 85-89   | 90-94 | 95-104 |
|                      | n=25,867          | n=1,127 | n=1,202 | n=1,473 | n=1,722 | n=1,824 | n=1,917 | n=2,144 | n=2,647 | n=4,489 | n=2,972 | n=1,723 | n=1,762 | n=703 | n=162  |
| <b>Total sample</b>  |                   |         |         |         |         |         |         |         |         |         |         |         |         |       |        |
| Very good            | 15.7              | 25.6    | 25.0    | 23.0    | 22.2    | 18.9    | 18.9    | 16.5    | 17.4    | 15.2    | 10.6    | 7.1     | 5.0     | 3.6   | 1.8    |
| Good                 | 48.9              | 55.2    | 54.2    | 55.1    | 53.5    | 52.1    | 49.7    | 51.6    | 52.7    | 51.1    | 46.0    | 40.7    | 34.7    | 29.9  | 33.3   |
| Neither good nor bad | 28.5              | 13.4    | 16.6    | 16.8    | 19.0    | 21.5    | 25.2    | 25.9    | 25.1    | 28.3    | 36.3    | 42.2    | 47.3    | 53.1  | 46.3   |
| Bad                  | 5.1               | 4.1     | 3.0     | 4.1     | 4.2     | 6.1     | 4.7     | 4.6     | 4.1     | 3.7     | 5.3     | 7.3     | 9.5     | 9.2   | 11.7   |
| Very bad             | 0.8               | 0.7     | 0.7     | 0.7     | 1.0     | 0.7     | 1.0     | 0.7     | 0.3     | 0.9     | 0.9     | 1.5     | 2.0     | 3.1   | 5.6    |
| Missing              | 0.7               | 0.9     | 0.6     | 0.3     | 0.1     | 0.8     | 0.5     | 0.8     | 0.4     | 0.8     | 0.9     | 1.2     | 1.4     | 1.1   | 1.2    |
| <b>Men</b>           |                   |         |         |         |         |         |         |         |         |         |         |         |         |       |        |
| Very good            | 15.7              | 28.4    | 29.3    | 26.4    | 23.1    | 18.9    | 17.1    | 15.5    | 16.8    | 15.2    | 11.8    | 7.1     | 5.8     | 4.4   | 0.0    |
| Good                 | 50.2              | 58.1    | 56.7    | 56.1    | 57.1    | 54.7    | 54.5    | 52.7    | 53.7    | 51.8    | 46.1    | 42.8    | 36.5    | 32.7  | 35.9   |
| Neither good nor bad | 27.5              | 8.0     | 10.8    | 13.7    | 15.9    | 20.2    | 22.1    | 26.0    | 24.8    | 27.5    | 35.2    | 40.7    | 44.6    | 50.3  | 46.9   |
| Bad                  | 5.0               | 3.2     | 2.0     | 2.9     | 3.2     | 4.9     | 4.6     | 4.6     | 4.0     | 4.1     | 5.4     | 7.0     | 10.0    | 8.8   | 14.1   |
| Very bad             | 1.0               | 0.9     | 0.8     | 0.6     | 0.7     | 0.6     | 1.1     | 0.6     | 0.4     | 0.8     | 0.9     | 1.5     | 2.0     | 3.3   | 3.1    |
| Missing              | 0.6               | 1.4     | 0.4     | 0.2     | 0.1     | 0.8     | 0.6     | 0.6     | 0.3     | 0.6     | 0.6     | 0.8     | 1.2     | 0.6   | 0.0    |
| <b>Women</b>         |                   |         |         |         |         |         |         |         |         |         |         |         |         |       |        |
| Very good            | 15.7              | 23.9    | 22.0    | 20.4    | 21.5    | 18.8    | 20.3    | 17.3    | 17.9    | 15.2    | 9.3     | 7.0     | 4.0     | 2.6   | 3.1    |
| Good                 | 47.8              | 53.3    | 52.4    | 54.4    | 50.7    | 50.2    | 46.0    | 50.7    | 51.9    | 50.3    | 46.0    | 38.7    | 32.2    | 26.8  | 31.6   |
| Neither good or bad  | 29.4              | 16.8    | 20.7    | 19.1    | 21.4    | 22.5    | 27.6    | 25.8    | 25.3    | 29.2    | 37.4    | 43.7    | 50.9    | 56.0  | 45.9   |
| Bad                  | 5.2               | 4.6     | 3.7     | 4.9     | 4.9     | 7.0     | 4.7     | 4.5     | 4.1     | 3.3     | 5.2     | 7.6     | 9.0     | 9.7   | 10.2   |
| Very bad             | 1.0               | 0.7     | 0.6     | 0.7     | 1.3     | 0.7     | 1.0     | 0.8     | 0.2     | 1.1     | 1.0     | 1.5     | 2.1     | 3.0   | 7.1    |
| Missing              | 0.8               | 0.6     | 0.7     | 0.5     | 0.1     | 0.8     | 0.4     | 0.9     | 0.5     | 0.9     | 1.2     | 1.5     | 1.7     | 1.8   | 2.0    |



**Table S10** Problems in EQ-5D-5L dimensions (%), mean and median EQ VAS score, mean TTO index value, and mean VAS index value, total sample, by self-rated health (SRH) level, 30–104 years (n=25,677)

| EQ-5D-5L dimension                 | Self-rated health (SRH) |               |                      |               |               |
|------------------------------------|-------------------------|---------------|----------------------|---------------|---------------|
|                                    | Very good               | Good          | Neither good nor bad | Bad           | Very bad      |
|                                    | n=4,064                 | n=12,650      | n=7,378              | n=1,323       | n=262         |
| <b>Mobility</b>                    |                         |               |                      |               |               |
| No problems                        | 96.5                    | 81.0          | 40.0                 | 17.8          | 12.2          |
| Slight problems                    | 2.7                     | 14.6          | 29.5                 | 19.0          | 10.7          |
| Moderate problems                  | 0.5                     | 3.5           | 21.7                 | 28.0          | 17.6          |
| Severe problems                    | 0.2                     | 0.7           | 7.2                  | 29.0          | 41.6          |
| Extreme problems                   | 0.2                     | 0.3           | 1.6                  | 6.2           | 17.9          |
| <b>Self-care</b>                   |                         |               |                      |               |               |
| No problems                        | 99.5                    | 96.9          | 79.9                 | 48.7          | 27.5          |
| Slight problems                    | 0.3                     | 2.2           | 12.4                 | 22.0          | 16.0          |
| Moderate problems                  | 0.1                     | 0.5           | 5.2                  | 16.2          | 19.1          |
| Severe problems                    | 0.0                     | 0.2           | 1.5                  | 7.9           | 19.5          |
| Extreme problems                   | 0.0                     | 0.2           | 1.0                  | 5.3           | 17.9          |
| <b>Usual activities</b>            |                         |               |                      |               |               |
| No problems                        | 97.6                    | 84.7          | 40.2                 | 10.3          | 4.6           |
| Slight problems                    | 1.9                     | 12.6          | 35.9                 | 24.0          | 6.5           |
| Moderate problems                  | 0.2                     | 1.7           | 16.2                 | 26.1          | 16.0          |
| Severe problems                    | 0.2                     | 0.6           | 5.3                  | 26.8          | 36.3          |
| Extreme problems                   | 0.1                     | 0.4           | 2.4                  | 12.9          | 36.6          |
| <b>Pain/discomfort</b>             |                         |               |                      |               |               |
| No problems                        | 71.1                    | 36.0          | 9.4                  | 4.4           | 5.3           |
| Slight problems                    | 25.3                    | 49.8          | 36.7                 | 13.4          | 8.0           |
| Moderate problems                  | 3.4                     | 13.1          | 45.0                 | 44.7          | 25.6          |
| Severe problems                    | 0.2                     | 1.0           | 8.6                  | 35.4          | 41.2          |
| Extreme problems                   | 0.02                    | 0.05          | 0.4                  | 2.1           | 19.8          |
| <b>Anxiety/depression</b>          |                         |               |                      |               |               |
| No problems                        | 89.0                    | 71.5          | 44.0                 | 15.3          | 14.1          |
| Slight problems                    | 10.3                    | 25.8          | 42.7                 | 37.7          | 21.0          |
| Moderate problems                  | 0.5                     | 2.2           | 10.7                 | 27.7          | 24.4          |
| Severe problems                    | 0.1                     | 0.3           | 2.3                  | 16.5          | 26.0          |
| Extreme problems                   | 0.02                    | 0.1           | 0.3                  | 2.9           | 14.5          |
| <b>EQ VAS score (mean) [SD]</b>    | 92.0 [8.7]              | 82.2 [11.3]   | 64.3 [15.6]          | 41.5 [16.9]   | 24.2 [20.3]   |
| <b>EQ VAS score (median) [IQR]</b> | 95.0 [8.0]              | 85.0 [15.0]   | 67.0 [25.0]          | 40.0 [20.0]   | 20.0 [23.0]   |
| <b>TTO index value (mean) [SD]</b> | 0.964 [0.029]           | 0.935 [0.056] | 0.833 [0.109]        | 0.667 [0.140] | 0.535 [0.161] |
| <b>VAS index value (mean) [SD]</b> | 86.2 [4.8]              | 81.1 [8.0]    | 67.6 [12.7]          | 49.3 [14.0]   | 36.1 [16.3]   |

**Table S11** Odds Ratios (OR) (multivariable logistic regression) for reporting any problems on the EQ-5D-5L dimensions and respondent's sex, age, educational level and income, 30–104 years (n=25,867)

|                                      | Mobility     |                    |                  | Self-care    |                    |                  | Usual activities |                   |                  | Pain/discomfort |                  |                  | Anxiety/depression |                  |                  |
|--------------------------------------|--------------|--------------------|------------------|--------------|--------------------|------------------|------------------|-------------------|------------------|-----------------|------------------|------------------|--------------------|------------------|------------------|
|                                      | OR           | 95% CI             | P-value          | OR           | 95% CI             | P-value          | OR               | 95% CI            | P-value          | OR              | 95% CI           | P-value          | OR                 | 95% CI           | P-value          |
| <b>Sex<sup>a</sup></b>               |              |                    |                  |              |                    |                  |                  |                   |                  |                 |                  |                  |                    |                  |                  |
| Women                                | <b>1.07</b>  | <b>1.01-1.14</b>   | <b>0.0261</b>    | <b>0.81</b>  | <b>0.74-0.88</b>   | <b>&lt;.0001</b> | <b>1.10</b>      | <b>1.04-1.17</b>  | <b>0.0011</b>    | <b>1.37</b>     | <b>1.29-1.45</b> | <b>&lt;.0001</b> | <b>1.38</b>        | <b>1.31-1.46</b> | <b>&lt;.0001</b> |
| <b>Age group<sup>b</sup></b>         |              |                    |                  |              |                    |                  |                  |                   |                  |                 |                  |                  |                    |                  |                  |
| 35-39                                | 1.00         | 0.77-1.30          | 0.9943           | <b>0.49</b>  | <b>0.28-0.83</b>   | <b>0.0089</b>    | 0.95             | 0.77-1.18         | 0.6343           | 1.05            | 0.89-1.24        | 0.5641           | 0.85               | 0.72-1.00        | 0.0545           |
| 40-44                                | <b>1.34</b>  | <b>1.04-1.71</b>   | <b>0.0213</b>    | 1.29         | 0.85-1.95          | 0.2261           | 1.18             | 0.97-1.45         | 0.1027           | <b>1.45</b>     | <b>1.24-1.70</b> | <b>&lt;.0001</b> | 0.89               | 0.76-1.04        | 0.1390           |
| 45-49                                | <b>1.73</b>  | <b>1.37-2.18</b>   | <b>&lt;.0001</b> | 1.47         | 0.99-2.17          | 0.0544           | <b>1.35</b>      | <b>1.11-1.64</b>  | <b>0.0023</b>    | <b>1.56</b>     | <b>1.34-1.82</b> | <b>&lt;.0001</b> | <b>0.75</b>        | <b>0.64-0.87</b> | <b>0.0002</b>    |
| 50-54                                | <b>2.27</b>  | <b>1.82-2.84</b>   | <b>&lt;.0001</b> | <b>2.18</b>  | <b>1.51-3.14</b>   | <b>&lt;.0001</b> | <b>1.46</b>      | <b>1.21-1.76</b>  | <b>&lt;.0001</b> | <b>1.93</b>     | <b>1.65-2.25</b> | <b>&lt;.0001</b> | <b>0.78</b>        | <b>0.67-0.91</b> | <b>0.0014</b>    |
| 55-59                                | <b>2.81</b>  | <b>2.26-3.49</b>   | <b>&lt;.0001</b> | <b>2.59</b>  | <b>1.81-3.70</b>   | <b>&lt;.0001</b> | <b>1.72</b>      | <b>1.43-2.07</b>  | <b>&lt;.0001</b> | <b>2.22</b>     | <b>1.90-2.59</b> | <b>&lt;.0001</b> | <b>0.59</b>        | <b>0.51-0.69</b> | <b>&lt;.0001</b> |
| 60-64                                | <b>3.20</b>  | <b>2.59-3.96</b>   | <b>&lt;.0001</b> | <b>2.22</b>  | <b>1.56-3.17</b>   | <b>&lt;.0001</b> | <b>1.75</b>      | <b>1.46-2.10</b>  | <b>&lt;.0001</b> | <b>2.30</b>     | <b>1.98-2.68</b> | <b>&lt;.0001</b> | <b>0.50</b>        | <b>0.43-0.58</b> | <b>&lt;.0001</b> |
| 65-69                                | <b>3.04</b>  | <b>2.47-3.75</b>   | <b>&lt;.0001</b> | <b>1.82</b>  | <b>1.28-2.58</b>   | <b>0.0008</b>    | <b>1.33</b>      | <b>1.12-1.59</b>  | <b>0.0015</b>    | <b>2.16</b>     | <b>1.87-2.50</b> | <b>&lt;.0001</b> | <b>0.37</b>        | <b>0.32-0.43</b> | <b>&lt;.0001</b> |
| 70-74                                | <b>3.26</b>  | <b>2.67-3.99</b>   | <b>&lt;.0001</b> | <b>1.98</b>  | <b>1.42-2.76</b>   | <b>&lt;.0001</b> | <b>1.26</b>      | <b>1.06-1.49</b>  | <b>0.0078</b>    | <b>1.78</b>     | <b>1.55-2.04</b> | <b>&lt;.0001</b> | <b>0.38</b>        | <b>0.33-0.44</b> | <b>&lt;.0001</b> |
| 75-79                                | <b>4.49</b>  | <b>3.66-5.51</b>   | <b>&lt;.0001</b> | <b>2.46</b>  | <b>1.76-3.44</b>   | <b>&lt;.0001</b> | <b>1.74</b>      | <b>1.47-2.07</b>  | <b>&lt;.0001</b> | <b>2.14</b>     | <b>1.84-2.48</b> | <b>&lt;.0001</b> | <b>0.40</b>        | <b>0.34-0.46</b> | <b>&lt;.0001</b> |
| 80-84                                | <b>7.07</b>  | <b>5.71-8.77</b>   | <b>&lt;.0001</b> | <b>4.04</b>  | <b>2.88-5.69</b>   | <b>&lt;.0001</b> | <b>2.71</b>      | <b>2.26-3.26</b>  | <b>&lt;.0001</b> | <b>2.57</b>     | <b>2.17-3.04</b> | <b>&lt;.0001</b> | <b>0.43</b>        | <b>0.37-0.51</b> | <b>&lt;.0001</b> |
| 85-89                                | <b>12.88</b> | <b>10.36-16.01</b> | <b>&lt;.0001</b> | <b>6.37</b>  | <b>4.55-8.92</b>   | <b>&lt;.0001</b> | <b>4.31</b>      | <b>3.59-5.18</b>  | <b>&lt;.0001</b> | <b>3.04</b>     | <b>2.56-3.61</b> | <b>&lt;.0001</b> | <b>0.57</b>        | <b>0.49-0.67</b> | <b>&lt;.0001</b> |
| 90-94                                | <b>20.75</b> | <b>15.93-27.02</b> | <b>&lt;.0001</b> | <b>13.28</b> | <b>9.33-18.89</b>  | <b>&lt;.0001</b> | <b>7.40</b>      | <b>5.89-9.29</b>  | <b>&lt;.0001</b> | <b>3.75</b>     | <b>2.96-4.75</b> | <b>&lt;.0001</b> | <b>0.61</b>        | <b>0.50-0.74</b> | <b>&lt;.0001</b> |
| 95-104                               | <b>42.19</b> | <b>25.13-70.83</b> | <b>&lt;.0001</b> | <b>32.67</b> | <b>20.65-51.67</b> | <b>&lt;.0001</b> | <b>12.13</b>     | <b>7.93-18.54</b> | <b>&lt;.0001</b> | <b>3.81</b>     | <b>2.43-5.95</b> | <b>&lt;.0001</b> | 0.89               | 0.63-1.25        | 0.4929           |
| <b>Educational level<sup>c</sup></b> |              |                    |                  |              |                    |                  |                  |                   |                  |                 |                  |                  |                    |                  |                  |
| Medium                               | <b>0.91</b>  | <b>0.84-0.97</b>   | <b>0.0077</b>    | <b>0.90</b>  | <b>0.81-0.99</b>   | <b>0.0385</b>    | 0.97             | 0.91-1.05         | 0.4657           | 1.00            | 0.93-1.08        | 0.9450           | 0.99               | 0.92-1.06        | 0.7485           |
| High                                 | <b>0.72</b>  | <b>0.66-0.78</b>   | <b>&lt;.0001</b> | <b>0.74</b>  | <b>0.65-0.84</b>   | <b>&lt;.0001</b> | <b>0.76</b>      | <b>0.70-0.82</b>  | <b>&lt;.0001</b> | <b>0.71</b>     | <b>0.66-0.78</b> | <b>&lt;.0001</b> | 1.00               | 0.92-1.08        | 0.9524           |
| Missing                              | <b>1.54</b>  | <b>1.05-2.25</b>   | <b>0.0271</b>    | <b>1.95</b>  | <b>1.28-2.98</b>   | <b>0.0019</b>    | <b>1.73</b>      | <b>1.20-2.50</b>  | <b>0.0034</b>    | <b>0.84</b>     | <b>0.57-1.22</b> | <b>0.3514</b>    | <b>1.27</b>        | <b>0.90-1.80</b> | <b>0.1793</b>    |
| <b>Income quintile<sup>d</sup></b>   |              |                    |                  |              |                    |                  |                  |                   |                  |                 |                  |                  |                    |                  |                  |
| Second                               | 1.03         | 0.95-1.12          | 0.4372           | 0.95         | 0.85-1.06          | 0.3275           | 0.98             | 0.90-1.06         | 0.6189           | 1.06            | 0.97-1.16        | 0.2246           | <b>0.92</b>        | <b>0.85-0.99</b> | <b>0.033</b>     |
| Third                                | <b>0.78</b>  | <b>0.71-0.85</b>   | <b>&lt;.0001</b> | <b>0.67</b>  | <b>0.59-0.76</b>   | <b>&lt;.0001</b> | <b>0.73</b>      | <b>0.67-0.80</b>  | <b>&lt;.0001</b> | <b>0.85</b>     | <b>0.78-0.93</b> | <b>0.0005</b>    | <b>0.70</b>        | <b>0.64-0.76</b> | <b>&lt;.0001</b> |
| Fourth                               | <b>0.59</b>  | <b>0.53-0.65</b>   | <b>&lt;.0001</b> | <b>0.45</b>  | <b>0.38-0.53</b>   | <b>&lt;.0001</b> | <b>0.51</b>      | <b>0.46-0.56</b>  | <b>&lt;.0001</b> | <b>0.73</b>     | <b>0.66-0.80</b> | <b>&lt;.0001</b> | <b>0.53</b>        | <b>0.49-0.58</b> | <b>&lt;.0001</b> |
| Fifth (highest)                      | <b>0.46</b>  | <b>0.41-0.51</b>   | <b>&lt;.0001</b> | <b>0.32</b>  | <b>0.27-0.38</b>   | <b>&lt;.0001</b> | <b>0.41</b>      | <b>0.37-0.45</b>  | <b>&lt;.0001</b> | <b>0.59</b>     | <b>0.53-0.65</b> | <b>&lt;.0001</b> | <b>0.44</b>        | <b>0.40-0.48</b> | <b>&lt;.0001</b> |
| Missing                              | <b>0.88</b>  | <b>0.48-1.61</b>   | <b>0.6685</b>    | 0.41         | 0.12-1.34          | 0.1383           | <b>0.41</b>      | <b>0.21-0.77</b>  | <b>0.0063</b>    | <b>0.43</b>     | <b>0.26-0.71</b> | <b>0.0009</b>    | <b>0.32</b>        | <b>0.19-0.54</b> | <b>&lt;.0001</b> |
| <b>N</b>                             | 25,867       |                    |                  | 25,867       |                    |                  | 25,867           |                   |                  | 25,867          |                  |                  | 25,867             |                  |                  |

Reference groups: <sup>a</sup>Men; <sup>b</sup>30–34 years; <sup>c</sup>Low educational level; <sup>d</sup>First quintile (lowest)  
 Statistically significant estimates are shown in bold (<0.05)

Women were significantly more likely than men to report problems with mobility, usual activities, pain/discomfort and anxiety/depression and less likely to report problems with self-care. Having high or medium education resulted in statistically significantly lower OR to report problems with mobility and self-care compared to those with low education. Those with high education had significantly lower OR to report problems with usual activities and pain/discomfort. There was no significant difference between educational groups for reporting problems with anxiety/depression. In all dimensions, those in the fifth (highest), fourth and third income quintiles had significantly lower OR to report problems than those in the first (lowest) income quintile. There were no significant difference between those in the next to lowest and lowest income quintiles in any dimension, except that those in the next to the lowest had significantly higher OR to report problems with anxiety/depression than those in the lowest quintile.

**Table S12** Odds Ratios (OR) (multivariable logistic regression) for reporting any problems on the EQ-5D-5L dimensions and respondent's sex, age, educational level, income and economic activity, 30–64 years (n=11,409)

|                                      | Mobility    |                  |                  | Self-care   |                   |                  | Usual activities |                  |                  | Pain/discomfort |                  |                   | Anxiety/depression |                  |                   |
|--------------------------------------|-------------|------------------|------------------|-------------|-------------------|------------------|------------------|------------------|------------------|-----------------|------------------|-------------------|--------------------|------------------|-------------------|
|                                      | OR          | 95% CI           | P-value          | OR          | 95% CI            | P-value          | OR               | 95% CI           | P-value          | OR              | 95% CI           | P-value           | OR                 | 95% CI           | P-value           |
| <b>Sex<sup>a</sup></b>               |             |                  |                  |             |                   |                  |                  |                  |                  |                 |                  |                   |                    |                  |                   |
| Men                                  | 1           |                  |                  | 1           |                   |                  | 1                |                  |                  | 1               |                  |                   | 1                  |                  |                   |
| Women                                | 1.1         | 0.98-1.22        | 0.0980           | <b>0.79</b> | <b>0.65-0.94</b>  | <b>0.0092</b>    | <b>1.20</b>      | <b>1.09-1.33</b> | <b>0.0004</b>    | <b>1.36</b>     | <b>1.25-1.47</b> | <b>&lt;0.0001</b> | <b>1.36</b>        | <b>1.26-1.48</b> | <b>&lt;0.0001</b> |
| <b>Age group<sup>b</sup></b>         |             |                  |                  |             |                   |                  |                  |                  |                  |                 |                  |                   |                    |                  |                   |
| 35-39                                | 1.06        | 0.81-1.39        | 0.6917           | <b>0.52</b> | <b>0.30-0.91</b>  | <b>0.0219</b>    | 0.99             | 0.79-1.23        | 0.9179           | 1.05            | 0.89-1.24        | 0.5591            | 0.86               | 0.73-1.02        | 0.0735            |
| 40-44                                | <b>1.39</b> | <b>1.08-1.79</b> | <b>0.0110</b>    | 1.30        | 0.84-1.99         | 0.2356           | 1.19             | 0.96-1.46        | 0.1096           | <b>1.42</b>     | <b>1.21-1.67</b> | <b>&lt;.0001</b>  | 0.88               | 0.75-1.03        | 0.1153            |
| 45-49                                | <b>1.81</b> | <b>1.43-2.30</b> | <b>&lt;.0001</b> | 1.47        | 0.98-2.22         | 0.0646           | <b>1.36</b>      | <b>1.11-1.67</b> | <b>0.0026</b>    | <b>1.52</b>     | <b>1.30-1.79</b> | <b>&lt;.0001</b>  | <b>0.73</b>        | <b>0.63-0.86</b> | <b>0.0001</b>     |
| 50-54                                | <b>2.31</b> | <b>1.83-2.92</b> | <b>&lt;.0001</b> | <b>2.02</b> | <b>1.37-2.97</b>  | <b>0.0004</b>    | <b>1.41</b>      | <b>1.16-1.72</b> | <b>0.0007</b>    | <b>1.86</b>     | <b>1.59-2.18</b> | <b>&lt;.0001</b>  | <b>0.76</b>        | <b>0.65-0.89</b> | <b>0.0005</b>     |
| 55-59                                | <b>2.80</b> | <b>2.23-3.52</b> | <b>&lt;.0001</b> | <b>2.28</b> | <b>1.56-3.33</b>  | <b>&lt;.0001</b> | <b>1.63</b>      | <b>1.34-1.98</b> | <b>&lt;.0001</b> | <b>2.10</b>     | <b>1.79-2.46</b> | <b>&lt;.0001</b>  | <b>0.56</b>        | <b>0.47-0.65</b> | <b>&lt;.0001</b>  |
| 60-64                                | <b>2.84</b> | <b>2.26-3.56</b> | <b>&lt;.0001</b> | <b>1.50</b> | <b>1.02-2.19</b>  | <b>0.0387</b>    | <b>1.42</b>      | <b>1.17-1.73</b> | <b>0.0004</b>    | <b>2.08</b>     | <b>1.77-2.44</b> | <b>&lt;.0001</b>  | <b>0.45</b>        | <b>0.38-0.52</b> | <b>&lt;.0001</b>  |
| <b>Educational level<sup>c</sup></b> |             |                  |                  |             |                   |                  |                  |                  |                  |                 |                  |                   |                    |                  |                   |
| Medium                               | <b>0.84</b> | <b>0.71-1.00</b> | <b>0.0460</b>    | 0.82        | 0.63-1.05         | 0.1176           | 0.93             | 0.79-1.10        | 0.3914           | 0.90            | 0.77-1.06        | 0.1921            | 1.00               | 0.86-1.16        | 0.9615            |
| High                                 | <b>0.67</b> | <b>0.56-0.80</b> | <b>&lt;.0001</b> | <b>0.74</b> | <b>0.55-0.98</b>  | <b>0.0346</b>    | <b>0.74</b>      | <b>0.62-0.88</b> | <b>0.0005</b>    | <b>0.62</b>     | <b>0.52-0.72</b> | <b>&lt;.0001</b>  | 1.06               | 0.90-1.23        | 0.4964            |
| Missing                              | 1.74        | 0.87-3.50        | 0.1184           | 1.38        | 0.51-3.73         | 0.5320           | 1.16             | 0.56-2.39        | 0.6939           | 0.57            | 0.3-1.1          | 0.0942            | 0.99               | 0.50-1.94        | 0.9733            |
| <b>Income quintile<sup>d</sup></b>   |             |                  |                  |             |                   |                  |                  |                  |                  |                 |                  |                   |                    |                  |                   |
| Second                               | <b>1.35</b> | <b>1.09-1.67</b> | <b>0.0067</b>    | <b>1.43</b> | <b>1.06-1.91</b>  | <b>0.0177</b>    | <b>1.44</b>      | <b>1.17-1.77</b> | <b>0.0006</b>    | 1.18            | 0.96-1.46        | 0.1244            | 1.11               | 0.92-1.35        | 0.2767            |
| Third                                | 1.01        | 0.85-1.21        | 0.9094           | 1.13        | 0.87-1.49         | 0.3647           | 1.08             | 0.91-1.28        | 0.3834           | 1.09            | 0.93-1.28        | 0.2881            | 0.92               | 0.79-1.07        | 0.2792            |
| Fourth                               | <b>0.76</b> | <b>0.64-0.91</b> | <b>0.0025</b>    | <b>0.72</b> | <b>0.54-0.97</b>  | <b>0.0279</b>    | <b>0.75</b>      | <b>0.63-0.88</b> | <b>0.0007</b>    | 0.92            | 0.79-1.07        | 0.2845            | <b>0.73</b>        | <b>0.63-0.84</b> | <b>&lt;.0001</b>  |
| Fifth (highest)                      | <b>0.53</b> | <b>0.44-0.64</b> | <b>&lt;.0001</b> | <b>0.44</b> | <b>0.32-0.62</b>  | <b>&lt;.0001</b> | <b>0.55</b>      | <b>0.46-0.66</b> | <b>&lt;.0001</b> | <b>0.68</b>     | <b>0.59-0.80</b> | <b>&lt;.0001</b>  | <b>0.55</b>        | <b>0.47-0.64</b> | <b>&lt;.0001</b>  |
| Missing                              | 0.92        | 0.48-1.77        | 0.7976           | 0.48        | 0.14-1.70         | 0.2572           | <b>0.43</b>      | <b>0.21-0.88</b> | <b>0.0200</b>    | <b>0.47</b>     | <b>0.27-0.81</b> | <b>0.0065</b>     | <b>0.32</b>        | <b>0.18-0.57</b> | <b>0.0001</b>     |
| <b>Economic activity<sup>e</sup></b> |             |                  |                  |             |                   |                  |                  |                  |                  |                 |                  |                   |                    |                  |                   |
| Studying/ parental leave             | 1.14        | 0.83-1.55        | 0.4177           | 0.96        | 0.49-1.85         | 0.8907           | 1.10             | 0.84-1.43        | 0.5073           | 0.88            | 0.71-1.09        | 0.2249            | 0.98               | 0.80-1.22        | 0.8845            |
| Unemployed                           | <b>2.68</b> | <b>2.13-3.37</b> | <b>&lt;.0001</b> | <b>4.02</b> | <b>2.91-5.56</b>  | <b>&lt;.0001</b> | <b>2.53</b>      | <b>2.03-3.15</b> | <b>&lt;.0001</b> | <b>1.37</b>     | <b>1.08-1.73</b> | <b>0.0092</b>     | <b>3.01</b>        | <b>2.40-3.78</b> | <b>&lt;.0001</b>  |
| Retired                              | 1.35        | 0.89-2.05        | 0.1567           | 1.36        | 0.58-3.18         | 0.4823           | 1.29             | 0.84-1.97        | 0.2453           | 0.97            | 0.65-1.45        | 0.8814            | 0.67               | 0.43-1.05        | 0.0775            |
| Sick leave                           | <b>3.91</b> | <b>3.30-4.63</b> | <b>&lt;.0001</b> | <b>8.61</b> | <b>6.82-10.87</b> | <b>&lt;.0001</b> | <b>5.80</b>      | <b>4.90-6.87</b> | <b>&lt;.0001</b> | <b>2.37</b>     | <b>1.94-2.9</b>  | <b>&lt;.0001</b>  | <b>2.72</b>        | <b>2.30-3.20</b> | <b>&lt;.0001</b>  |
| Missing                              | 1.39        | 0.86-2.27        | 0.1826           | <b>2.60</b> | <b>1.28-5.26</b>  | <b>0.0082</b>    | 1.33             | 0.84-2.09        | 0.2264           | 1.02            | 0.68-1.53        | 0.9217            | 1.41               | 0.95-2.08        | 0.0896            |
| <b>N</b>                             | 11,409      |                  |                  | 11,409      |                   |                  | 11,409           |                  |                  | 11,409          |                  |                   | 11,409             |                  |                   |

Reference groups: <sup>a</sup>Men; <sup>b</sup>30–34 years; <sup>c</sup>Low educational level; <sup>d</sup>First quintile (lowest); <sup>e</sup>Employed  
 Statistically significant estimates are shown in bold (<0.05)

Unemployed respondents, and those on sick leave, had significantly higher OR to report problems in all dimensions than those who were employed.

**Table S13** Ordinary Least Square (OLS) regression on mean EQ VAS score adjusted for sex, age, educational level, income and economic activity, 30–64 years (n=10,800)

| Variable                                              | EQ VAS score  |              |                  |               |              |                  |               |              |                  |                |              |                  |
|-------------------------------------------------------|---------------|--------------|------------------|---------------|--------------|------------------|---------------|--------------|------------------|----------------|--------------|------------------|
|                                                       | Model 1       |              |                  | Model 2       |              |                  | Model 3       |              |                  | Model 4        |              |                  |
|                                                       | Estimate      | RSE          | P-value          | Estimate      | RSE          | P-value          | Estimate      | RSE          | P-value          | Estimate       | RSE          | P-value          |
| <b>Intercept</b>                                      | <b>76.500</b> | <b>0.842</b> | <b>&lt;.0001</b> | <b>73.831</b> | <b>0.772</b> | <b>&lt;.0001</b> | <b>72.038</b> | <b>0.982</b> | <b>&lt;.0001</b> | <b>79.051</b>  | <b>0.968</b> | <b>&lt;.0001</b> |
| <b>Sex<sup>a</sup></b>                                |               |              |                  |               |              |                  |               |              |                  |                |              |                  |
| Women                                                 | <b>-2.772</b> | <b>0.329</b> | <b>&lt;.0001</b> | <b>-1.113</b> | <b>0.337</b> | <b>0.0010</b>    | <b>-1.462</b> | <b>0.346</b> | <b>&lt;.0001</b> | <b>-1.075</b>  | <b>0.332</b> | <b>0.0012</b>    |
| <b>Age group<sup>b</sup></b>                          |               |              |                  |               |              |                  |               |              |                  |                |              |                  |
| 35-39                                                 | -0.487        | 0.671        | 0.4679           | -1.277        | 0.679        | 0.0599           | -1.246        | 0.676        | 0.0656           | -1.191         | 0.661        | 0.0714           |
| 40-44                                                 | -0.549        | 0.655        | 0.4017           | <b>-2.470</b> | <b>0.661</b> | <b>0.0002</b>    | <b>-2.285</b> | <b>0.661</b> | <b>0.0005</b>    | <b>-1.650</b>  | <b>0.638</b> | <b>0.0098</b>    |
| 45-49                                                 | -0.754        | 0.642        | 0.2404           | <b>-2.818</b> | <b>0.646</b> | <b>&lt;.0001</b> | <b>-2.540</b> | <b>0.648</b> | <b>&lt;.0001</b> | <b>-1.900</b>  | <b>0.633</b> | <b>0.0027</b>    |
| 50-54                                                 | -1.005        | 0.647        | 0.1207           | <b>-3.080</b> | <b>0.646</b> | <b>&lt;.0001</b> | <b>-2.662</b> | <b>0.651</b> | <b>&lt;.0001</b> | <b>-1.877</b>  | <b>0.630</b> | <b>0.0029</b>    |
| 55-59                                                 | -0.485        | 0.647        | 0.4538           | <b>-2.619</b> | <b>0.646</b> | <b>&lt;.0001</b> | <b>-2.146</b> | <b>0.649</b> | <b>0.0010</b>    | -1.083         | 0.634        | 0.0875           |
| 60-64                                                 | 0.457         | 0.625        | 0.4651           | <b>-1.366</b> | <b>0.618</b> | <b>0.0271</b>    | -0.803        | 0.628        | 0.2010           | <b>1.344</b>   | <b>0.630</b> | <b>0.0329</b>    |
| <b>Educational level<sup>c</sup></b>                  |               |              |                  |               |              |                  |               |              |                  |                |              |                  |
| Medium                                                | <b>2.800</b>  | <b>0.734</b> | <b>0.0001</b>    |               |              |                  | 1.336         | 0.709        | 0.0594           | 0.423          | 0.665        | 0.5251           |
| High                                                  | <b>5.492</b>  | <b>0.730</b> | <b>&lt;.0001</b> |               |              |                  | <b>3.015</b>  | <b>0.716</b> | <b>&lt;.0001</b> | <b>1.360</b>   | <b>0.676</b> | <b>0.0441</b>    |
| Missing                                               | -0.011        | 0.033        | 0.7448           |               |              |                  | -0.012        | 0.032        | 0.7028           | 0.021          | 0.033        | 0.5226           |
| <b>Income (individual) (thousand SEK)<sup>d</sup></b> |               |              |                  |               |              |                  |               |              |                  |                |              |                  |
| Second quintile                                       |               |              |                  | -0.488        | 1.039        | 0.6384           | -0.445        | 1.035        | 0.6671           | <b>-2.176</b>  | <b>0.963</b> | <b>0.0239</b>    |
| Third quintile                                        |               |              |                  | <b>5.956</b>  | <b>0.746</b> | <b>&lt;.0001</b> | <b>5.908</b>  | <b>0.743</b> | <b>&lt;.0001</b> | 0.495          | 0.730        | 0.4981           |
| Fourth quintile                                       |               |              |                  | <b>8.849</b>  | <b>0.689</b> | <b>&lt;.0001</b> | <b>8.530</b>  | <b>0.685</b> | <b>&lt;.0001</b> | <b>2.227</b>   | <b>0.680</b> | <b>0.0011</b>    |
| Fifth quintile                                        |               |              |                  | <b>10.309</b> | <b>0.691</b> | <b>&lt;.0001</b> | <b>9.627</b>  | <b>0.694</b> | <b>&lt;.0001</b> | <b>3.393</b>   | <b>0.690</b> | <b>&lt;.0001</b> |
| Missing                                               |               |              |                  | <b>0.075</b>  | <b>0.026</b> | <b>0.0036</b>    | <b>0.081</b>  | <b>0.025</b> | <b>0.0011</b>    | <b>0.055</b>   | <b>0.026</b> | <b>0.0332</b>    |
| <b>Economic activity<sup>e</sup></b>                  |               |              |                  |               |              |                  |               |              |                  |                |              |                  |
| Studying/parental leave                               |               |              |                  |               |              |                  |               |              |                  | -1.577         | 0.950        | 0.0970           |
| Unemployed                                            |               |              |                  |               |              |                  |               |              |                  | <b>-10.629</b> | <b>1.264</b> | <b>&lt;.0001</b> |
| Retired                                               |               |              |                  |               |              |                  |               |              |                  | -0.765         | 1.329        | 0.5649           |
| Sick leave                                            |               |              |                  |               |              |                  |               |              |                  | <b>-19.398</b> | <b>0.937</b> | <b>&lt;.0001</b> |
| Missing                                               |               |              |                  |               |              |                  |               |              |                  | -2.172         | 1.837        | 0.2370           |
| <b>Adjusted R<sup>2</sup></b>                         | 0.0144        |              |                  | 0.0477        |              |                  | 0.0506        |              |                  | 0.1249         |              |                  |
| <b>RMSE</b>                                           | 17.00         |              |                  | 16.71         |              |                  | 16.69         |              |                  | 16.02          |              |                  |
| <b>N</b>                                              | 10,800        |              |                  | 10,800        |              |                  | 10,800        |              |                  | 10,800         |              |                  |

Reference groups: <sup>a</sup>Men; <sup>b</sup>30–34 years; <sup>c</sup>Low educational level; <sup>d</sup>First quintile (lowest); <sup>e</sup>Employed  
RSE: Robust Standard Error. Statistically significant estimates are shown in bold (<0.05)

**Table S14** Ordinary Least Square (OLS) regression on mean EQ VAS score by health-related behaviours and diseases diagnosed by a physician, adjusted for sex, age, educational level and income, 30–104 years (n=23,899)

| Variable                                              | EQ VAS score   |              |                  |                |              |                  |                |              |                  |                |              |                  |                |              |                  |                |              |                  |
|-------------------------------------------------------|----------------|--------------|------------------|----------------|--------------|------------------|----------------|--------------|------------------|----------------|--------------|------------------|----------------|--------------|------------------|----------------|--------------|------------------|
|                                                       | Model 1        |              |                  | Model 2        |              |                  | Model 3        |              |                  | Model 4        |              |                  | Model 5        |              |                  | Model 6        |              |                  |
|                                                       | Estimate       | RSE          | P-value          | Estimate       | RSE          | P-value          | Estimate       | RSE          | P-value          | Estimate       | RSE          | P-value          | Estimate       | RSE          | P-value          | Estimate       | RSE          | P-value          |
| <b>Intercept</b>                                      | <b>84.371</b>  | <b>0.507</b> | <b>&lt;.0001</b> | <b>78.741</b>  | <b>0.651</b> | <b>&lt;.0001</b> | <b>81.782</b>  | <b>0.634</b> | <b>&lt;.0001</b> | <b>76.074</b>  | <b>0.628</b> | <b>&lt;.0001</b> | <b>82.666</b>  | <b>0.453</b> | <b>&lt;.0001</b> | <b>77.278</b>  | <b>0.603</b> | <b>77.278</b>    |
| <b>Sex<sup>a</sup></b>                                |                |              |                  |                |              |                  |                |              |                  |                |              |                  |                |              |                  |                |              |                  |
| Women                                                 | <b>-1.852</b>  | <b>0.224</b> | <b>&lt;.0001</b> | <b>-0.825</b>  | <b>0.235</b> | <b>0.0004</b>    | <b>-1.383</b>  | <b>0.223</b> | <b>&lt;.0001</b> | -0.388         | 0.236        | 0.1008           | <b>-0.965</b>  | <b>0.220</b> | <b>&lt;.0001</b> | -0.106         | 0.232        | 0.6465           |
| <b>Age group<sup>b</sup></b>                          |                |              |                  |                |              |                  |                |              |                  |                |              |                  |                |              |                  |                |              |                  |
| 35-39                                                 | -0.630         | 0.676        | 0.3512           | -1.187         | 0.673        | 0.0778           | -0.741         | 0.644        | 0.2497           | -1.221         | 0.645        | 0.0585           | -1.005         | 0.618        | 0.1039           | <b>-1.412</b>  | <b>0.621</b> | <b>0.0230</b>    |
| 40-44                                                 | -0.688         | 0.655        | 0.2940           | <b>-1.853</b>  | <b>0.653</b> | <b>0.0046</b>    | -0.806         | 0.624        | 0.1965           | <b>-1.870</b>  | <b>0.626</b> | <b>0.0028</b>    | <b>-1.188</b>  | <b>0.597</b> | <b>0.0466</b>    | <b>-2.102</b>  | <b>0.602</b> | <b>0.0005</b>    |
| 45-49                                                 | -0.963         | 0.635        | 0.1294           | <b>-2.079</b>  | <b>0.633</b> | <b>0.0010</b>    | -0.632         | 0.609        | 0.2993           | <b>-1.667</b>  | <b>0.611</b> | <b>0.0064</b>    | <b>-1.278</b>  | <b>0.582</b> | <b>0.0282</b>    | <b>-2.147</b>  | <b>0.588</b> | <b>0.0003</b>    |
| 50-54                                                 | <b>-1.732</b>  | <b>0.638</b> | <b>0.0066</b>    | <b>-2.591</b>  | <b>0.635</b> | <b>&lt;.0001</b> | -0.739         | 0.610        | 0.2254           | <b>-1.571</b>  | <b>0.612</b> | <b>0.0103</b>    | <b>-1.608</b>  | <b>0.584</b> | <b>0.0059</b>    | <b>-2.274</b>  | <b>0.589</b> | <b>0.0001</b>    |
| 55-59                                                 | -0.976         | 0.638        | 0.1264           | <b>-1.807</b>  | <b>0.635</b> | <b>0.0044</b>    | 0.313          | 0.612        | 0.6087           | -0.461         | 0.612        | 0.4514           | -0.585         | 0.584        | 0.3166           | <b>-1.199</b>  | <b>0.587</b> | <b>0.0411</b>    |
| 60-64                                                 | -0.346         | 0.614        | 0.5731           | -0.774         | 0.612        | 0.2060           | <b>1.890</b>   | <b>0.591</b> | <b>0.0014</b>    | <b>1.456</b>   | <b>0.593</b> | <b>0.0141</b>    | 0.373          | 0.566        | 0.5096           | 0.093          | 0.571        | 0.8713           |
| 65-69                                                 | -0.107         | 0.588        | 0.8553           | 0.260          | 0.588        | 0.6584           | <b>3.389</b>   | <b>0.573</b> | <b>&lt;.0001</b> | <b>3.653</b>   | <b>0.576</b> | <b>&lt;.0001</b> | <b>1.397</b>   | <b>0.552</b> | <b>0.0114</b>    | <b>1.742</b>   | <b>0.557</b> | <b>0.0018</b>    |
| 70-74                                                 | <b>-1.349</b>  | <b>0.551</b> | <b>0.0143</b>    | 0.319          | 0.558        | 0.5678           | <b>2.529</b>   | <b>0.539</b> | <b>&lt;.0001</b> | <b>4.009</b>   | <b>0.548</b> | <b>&lt;.0001</b> | 0.607          | 0.519        | 0.2422           | <b>1.993</b>   | <b>0.530</b> | <b>0.0002</b>    |
| 75-79                                                 | <b>-4.576</b>  | <b>0.590</b> | <b>&lt;.0001</b> | <b>-2.148</b>  | <b>0.606</b> | <b>0.0004</b>    | -0.852         | 0.583        | 0.1440           | <b>1.381</b>   | <b>0.601</b> | <b>0.0216</b>    | <b>-2.784</b>  | <b>0.566</b> | <b>&lt;.0001</b> | -0.741         | 0.584        | 0.2044           |
| 80-84                                                 | <b>-7.718</b>  | <b>0.685</b> | <b>&lt;.0001</b> | <b>-4.987</b>  | <b>0.704</b> | <b>&lt;.0001</b> | <b>-5.035</b>  | <b>0.694</b> | <b>&lt;.0001</b> | <b>-2.399</b>  | <b>0.715</b> | <b>0.0008</b>    | <b>-6.804</b>  | <b>0.670</b> | <b>&lt;.0001</b> | <b>-4.400</b>  | <b>0.691</b> | <b>&lt;.0001</b> |
| 85-89                                                 | <b>-11.461</b> | <b>0.715</b> | <b>&lt;.0001</b> | <b>-8.556</b>  | <b>0.737</b> | <b>&lt;.0001</b> | <b>-10.210</b> | <b>0.727</b> | <b>&lt;.0001</b> | <b>-7.358</b>  | <b>0.750</b> | <b>&lt;.0001</b> | <b>-12.059</b> | <b>0.709</b> | <b>&lt;.0001</b> | <b>-9.451</b>  | <b>0.733</b> | <b>&lt;.0001</b> |
| 90-94                                                 | <b>-13.788</b> | <b>1.006</b> | <b>&lt;.0001</b> | <b>-10.762</b> | <b>1.025</b> | <b>&lt;.0001</b> | <b>-15.356</b> | <b>1.044</b> | <b>&lt;.0001</b> | <b>-12.291</b> | <b>1.065</b> | <b>&lt;.0001</b> | <b>-17.081</b> | <b>1.023</b> | <b>&lt;.0001</b> | <b>-14.286</b> | <b>1.043</b> | <b>&lt;.0001</b> |
| 95-104                                                | <b>-16.122</b> | <b>1.963</b> | <b>&lt;.0001</b> | <b>-12.984</b> | <b>1.975</b> | <b>&lt;.0001</b> | <b>-20.509</b> | <b>2.113</b> | <b>&lt;.0001</b> | <b>-17.253</b> | <b>2.127</b> | <b>&lt;.0001</b> | <b>-21.284</b> | <b>2.109</b> | <b>&lt;.0001</b> | <b>-18.324</b> | <b>2.118</b> | <b>&lt;.0001</b> |
| <b>Educational level<sup>c</sup></b>                  |                |              |                  |                |              |                  |                |              |                  |                |              |                  |                |              |                  |                |              |                  |
| Medium                                                |                |              |                  | 0.551          | 0.325        | 0.0902           |                |              |                  | <b>0.908</b>   | <b>0.329</b> | <b>0.0058</b>    |                |              |                  | <b>0.853</b>   | <b>0.322</b> | <b>0.0081</b>    |
| High                                                  |                |              |                  | <b>1.611</b>   | <b>0.349</b> | <b>&lt;.0001</b> |                |              |                  | <b>1.722</b>   | <b>0.351</b> | <b>&lt;.0001</b> |                |              |                  | <b>1.749</b>   | <b>0.344</b> | <b>&lt;.0001</b> |
| Missing                                               |                |              |                  | <i>0.007</i>   | <i>0.018</i> | <i>0.7026</i>    |                |              |                  | <i>0.004</i>   | <i>0.018</i> | <i>0.8424</i>    |                |              |                  | <i>0.006</i>   | <i>0.018</i> | <i>0.7405</i>    |
| <b>Income (individual) (thousand SEK)<sup>d</sup></b> |                |              |                  |                |              |                  |                |              |                  |                |              |                  |                |              |                  |                |              |                  |
| Second quintile                                       |                |              |                  | 0.434          | 0.401        | 0.2785           |                |              |                  | <b>0.991</b>   | <b>0.408</b> | <b>0.0151</b>    |                |              |                  | <b>1.001</b>   | <b>0.398</b> | <b>0.0118</b>    |
| Third quintile                                        |                |              |                  | <b>3.238</b>   | <b>0.392</b> | <b>&lt;.0001</b> |                |              |                  | <b>3.803</b>   | <b>0.396</b> | <b>&lt;.0001</b> |                |              |                  | <b>3.431</b>   | <b>0.386</b> | <b>&lt;.0001</b> |
| Fourth quintile                                       |                |              |                  | <b>5.387</b>   | <b>0.407</b> | <b>&lt;.0001</b> |                |              |                  | <b>5.604</b>   | <b>0.407</b> | <b>&lt;.0001</b> |                |              |                  | <b>4.894</b>   | <b>0.396</b> | <b>&lt;.0001</b> |
| Fifth quintile                                        |                |              |                  | <b>6.859</b>   | <b>0.421</b> | <b>&lt;.0001</b> |                |              |                  | <b>6.502</b>   | <b>0.420</b> | <b>&lt;.0001</b> |                |              |                  | <b>5.783</b>   | <b>0.410</b> | <b>&lt;.0001</b> |
| Missing                                               |                |              |                  | <i>0.092</i>   | <i>0.023</i> | <i>&lt;.0001</i> |                |              |                  | <i>0.067</i>   | <i>0.022</i> | <i>0.0027</i>    |                |              |                  | <i>0.051</i>   | <i>0.021</i> | <i>0.0168</i>    |
| <b>Tobacco and alcohol</b>                            |                |              |                  |                |              |                  |                |              |                  |                |              |                  |                |              |                  |                |              |                  |
| Daily smoking <sup>e</sup>                            | <b>-3.322</b>  | <b>0.535</b> | <b>&lt;.0001</b> | <b>-2.234</b>  | <b>0.525</b> | <b>&lt;.0001</b> |                |              |                  |                |              |                  |                |              |                  |                |              |                  |
| Risk consumption of alcohol <sup>f</sup>              | -0.583         | 0.384        | 0.1288           | <b>-0.910</b>  | <b>0.379</b> | <b>0.0163</b>    |                |              |                  |                |              |                  |                |              |                  |                |              |                  |
| <b>Physical exercise<sup>g</sup></b>                  |                |              |                  |                |              |                  |                |              |                  |                |              |                  |                |              |                  |                |              |                  |
| Less than 150 minutes/week                            | <b>-7.356</b>  | <b>0.253</b> | <b>&lt;.0001</b> | <b>-6.650</b>  | <b>0.254</b> | <b>&lt;.0001</b> |                |              |                  |                |              |                  |                |              |                  |                |              |                  |
| <b>Sitting<sup>h</sup></b>                            |                |              |                  |                |              |                  |                |              |                  |                |              |                  |                |              |                  |                |              |                  |
| Sitting for 10 or more hours/day                      | <b>-10.235</b> | <b>0.409</b> | <b>&lt;.0001</b> | <b>-10.480</b> | <b>0.403</b> | <b>&lt;.0001</b> |                |              |                  |                |              |                  |                |              |                  |                |              |                  |
| <b>Diseases diagnosed by a physician<sup>i</sup></b>  |                |              |                  |                |              |                  |                |              |                  |                |              |                  |                |              |                  |                |              |                  |
| Asthma                                                |                |              |                  |                |              |                  |                |              |                  |                |              |                  | -3.343         | 0.479        | <.0001           | -3.288         | 0.473        | <.0001           |
| COPD                                                  |                |              |                  |                |              |                  |                |              |                  |                |              |                  | -11.312        | 0.816        | <.0001           | -10.741        | 0.808        | <.0001           |
| Depression                                            |                |              |                  |                |              |                  |                |              |                  |                |              |                  | -19.113        | 0.559        | <.0001           | -18.221        | 0.554        | <.0001           |
| Diabetes                                              |                |              |                  |                |              |                  |                |              |                  |                |              |                  | -5.202         | 0.477        | <.0001           | -4.809         | 0.470        | <.0001           |
| Hypertension                                          |                |              |                  |                |              |                  |                |              |                  |                |              |                  | -4.055         | 0.287        | <.0001           | -3.860         | 0.285        | <.0001           |
| <b>Number of diseases<sup>j</sup></b>                 |                |              |                  |                |              |                  |                |              |                  |                |              |                  |                |              |                  |                |              |                  |
| One                                                   |                |              |                  |                |              |                  | -7.298         | 0.271        | <.0001           | -6.865         | 0.268        | <.0001           |                |              |                  |                |              |                  |
| Two                                                   |                |              |                  |                |              |                  | -13.426        | 0.450        | <.0001           | -12.608        | 0.447        | <.0001           |                |              |                  |                |              |                  |
| Three                                                 |                |              |                  |                |              |                  | -25.177        | 1.201        | <.0001           | -23.673        | 1.174        | <.0001           |                |              |                  |                |              |                  |
| Four or more                                          |                |              |                  |                |              |                  | -29.101        | 2.731        | <.0001           | -27.799        | 2.643        | <.0001           |                |              |                  |                |              |                  |
| <b>Adjusted R<sup>2</sup></b>                         | 0.1537         |              |                  | 0.1708         |              |                  | 0.1465         |              |                  | 0.1620         |              |                  | 0.1839         |              |                  | 0.1962         |              |                  |
| <b>RMSE</b>                                           | 17.17          |              |                  | 17.00          |              |                  | 17.25          |              |                  | 17.09          |              |                  | 16.86          |              |                  | 16.74          |              |                  |
| <b>N</b>                                              | 23,899         |              |                  | 23,899         |              |                  | 23,899         |              |                  | 23,899         |              |                  | 23,899         |              |                  | 23,899         |              |                  |

Reference groups: <sup>a</sup>Men; <sup>b</sup>30–34 years; <sup>c</sup>Low educational level; <sup>d</sup>First income quintile (lowest); <sup>e</sup>No or occasionally smoking; <sup>f</sup>No risk consumption of alcohol; <sup>g</sup>150 minutes or more/week; <sup>h</sup>Sitting less than 10 hours per day; <sup>i</sup>Not having the specific disease; <sup>j</sup>No disease. RSE: Robust Standard Error. Statistically significant estimates are shown in bold (<0.05)

**Table S15** Ordinary Least Square (OLS) regression on mean EQ VAS score by Body Mass Index (BMI) groups, adjusted for sex, age, educational level and income, 30–104 years (n=23,899)

| Variable                                              | EQ VAS score   |              |                  |                |              |                  |
|-------------------------------------------------------|----------------|--------------|------------------|----------------|--------------|------------------|
|                                                       | Model 1        |              |                  | Model 2        |              |                  |
|                                                       | Estimate       | RSE          | P-value          | Estimate       | RSE          | P-value          |
| <b>Intercept</b>                                      | <b>82.276</b>  | <b>0.507</b> | <b>&lt;.0001</b> | <b>75.719</b>  | <b>0.665</b> | <b>&lt;.0001</b> |
| <b>Sex<sup>a</sup></b>                                |                |              |                  |                |              |                  |
| Women                                                 | <b>-1.491</b>  | <b>0.232</b> | <b>&lt;.0001</b> | -0.328         | 0.245        | 0.1797           |
| <b>Age group<sup>b</sup></b>                          |                |              |                  |                |              |                  |
| 35-39                                                 | -0.199         | 0.663        | 0.7637           | -0.800         | 0.664        | 0.2282           |
| 40-44                                                 | -0.384         | 0.644        | 0.5508           | <b>-1.661</b>  | <b>0.645</b> | <b>0.0100</b>    |
| 45-49                                                 | -0.393         | 0.628        | 0.5310           | <b>-1.646</b>  | <b>0.629</b> | <b>0.0088</b>    |
| 50-54                                                 | -0.925         | 0.632        | 0.1436           | <b>-1.931</b>  | <b>0.632</b> | <b>0.0023</b>    |
| 55-59                                                 | -0.305         | 0.634        | 0.6303           | -1.234         | 0.632        | 0.0510           |
| 60-64                                                 | 0.255          | 0.609        | 0.6757           | -0.225         | 0.609        | 0.7119           |
| 65-69                                                 | 1.116          | 0.583        | 0.0559           | <b>1.488</b>   | <b>0.584</b> | <b>0.0109</b>    |
| 70-74                                                 | -0.319         | 0.548        | 0.5601           | <b>1.484</b>   | <b>0.557</b> | <b>0.0077</b>    |
| 75-79                                                 | <b>-3.999</b>  | <b>0.589</b> | <b>&lt;.0001</b> | <b>-1.314</b>  | <b>0.610</b> | <b>0.0311</b>    |
| 80-84                                                 | <b>-8.723</b>  | <b>0.699</b> | <b>&lt;.0001</b> | <b>-5.559</b>  | <b>0.722</b> | <b>&lt;.0001</b> |
| 85-89                                                 | <b>-14.095</b> | <b>0.725</b> | <b>&lt;.0001</b> | <b>-10.678</b> | <b>0.753</b> | <b>&lt;.0001</b> |
| 90-94                                                 | <b>-19.117</b> | <b>1.046</b> | <b>&lt;.0001</b> | <b>-15.467</b> | <b>1.070</b> | <b>&lt;.0001</b> |
| 95-104                                                | <b>-23.883</b> | <b>2.121</b> | <b>&lt;.0001</b> | <b>-20.066</b> | <b>2.135</b> | <b>&lt;.0001</b> |
| <b>Educational level<sup>c</sup></b>                  |                |              |                  |                |              |                  |
| Medium                                                |                |              |                  | <b>0.890</b>   | <b>0.339</b> | <b>0.0086</b>    |
| High                                                  |                |              |                  | <b>1.644</b>   | <b>0.361</b> | <b>&lt;.0001</b> |
| Missing                                               |                |              |                  | 0.003          | 0.018        | 0.8843           |
| <b>Income (individual) (thousand SEK)<sup>d</sup></b> |                |              |                  |                |              |                  |
| Second quintile                                       |                |              |                  | <b>0.890</b>   | <b>0.421</b> | <b>0.0347</b>    |
| Third quintile                                        |                |              |                  | <b>4.267</b>   | <b>0.409</b> | <b>&lt;.0001</b> |
| Fourth quintile                                       |                |              |                  | <b>6.435</b>   | <b>0.422</b> | <b>&lt;.0001</b> |
| Fifth quintile                                        |                |              |                  | <b>7.364</b>   | <b>0.436</b> | <b>&lt;.0001</b> |
| Missing                                               |                |              |                  | <b>0.069</b>   | <b>0.024</b> | <b>0.0035</b>    |
| <b>BMI<sup>e</sup></b>                                |                |              |                  |                |              |                  |
| Underweight                                           | <b>-6.655</b>  | <b>1.210</b> | <b>&lt;.0001</b> | <b>-6.186</b>  | <b>1.193</b> | <b>&lt;.0001</b> |
| Overweight                                            | <b>-2.294</b>  | <b>0.257</b> | <b>&lt;.0001</b> | <b>-1.976</b>  | <b>0.255</b> | <b>&lt;.0001</b> |
| Obese class I                                         | <b>-7.099</b>  | <b>0.372</b> | <b>&lt;.0001</b> | <b>-6.418</b>  | <b>0.369</b> | <b>&lt;.0001</b> |
| Obese class II                                        | <b>-12.571</b> | <b>0.688</b> | <b>&lt;.0001</b> | <b>-11.641</b> | <b>0.682</b> | <b>&lt;.0001</b> |
| Obese class III                                       | <b>-12.872</b> | <b>1.064</b> | <b>&lt;.0001</b> | <b>-11.722</b> | <b>1.054</b> | <b>&lt;.0001</b> |
| <b>Adjusted R<sup>2</sup></b>                         | 0.1011         |              |                  | 0.1211         |              |                  |
| <b>RMSE</b>                                           | 17.70          |              |                  | 17.50          |              |                  |
| <b>N</b>                                              | 23,899         |              |                  | 23,899         |              |                  |

Reference groups: <sup>a</sup>Men; <sup>b</sup>30–34 years; <sup>c</sup>Low educational level; <sup>d</sup>First income quintile (lowest); <sup>e</sup>Normal weight  
RSE: Robust Standard Error. Statistically significant estimates are shown in bold (<0.05)

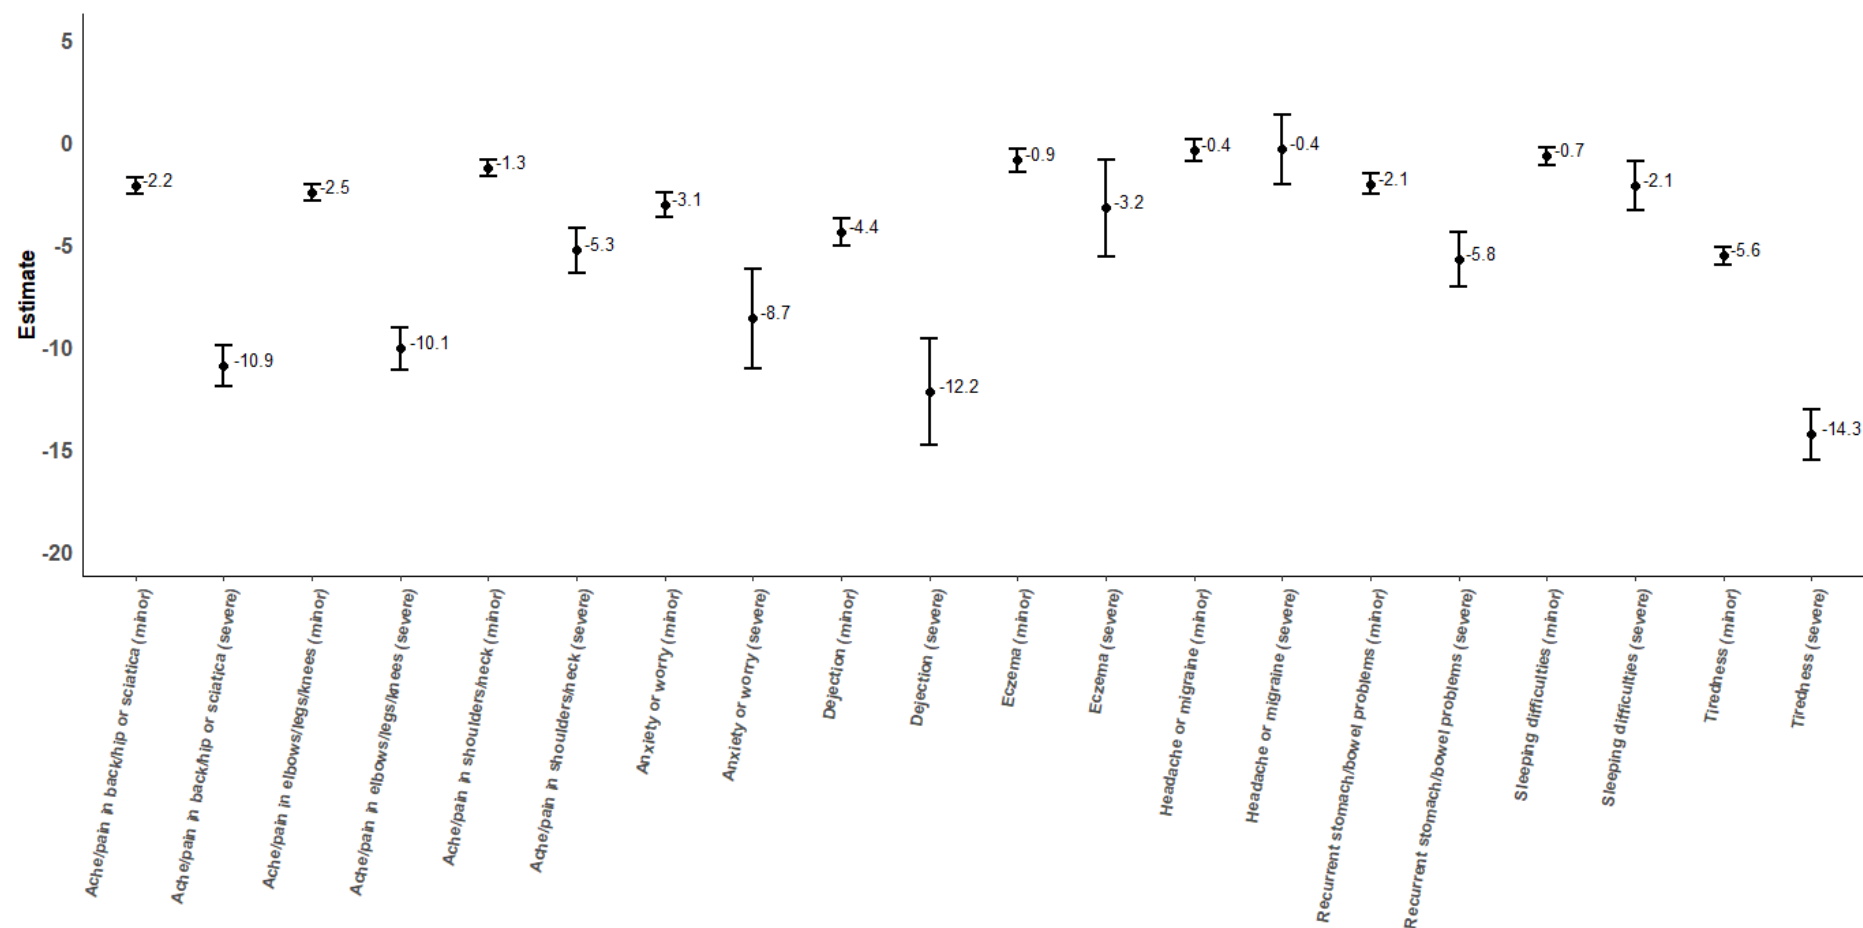

**Figure S1** Ordinary Least Square (OLS) regression on mean EQ VAS score by self-reported conditions, adjusted for sex, age, educational level and income, estimates showing reduction in mean EQ VAS score with confidence intervals, 30–104 years (n=23,899)
